# Supplementary material for: Nano-Fe3O4@SiO2-supported boron sulfonic acid as a novel magnetically heterogeneous catalyst for the synthesis of pyrano coumarins
Source: Royal Society of Chemistry journal article supplement (doi:10.1039/c7ra08253c), 2017-01-01

**Nano-Fe<sub>3</sub>O<sub>4</sub>@SiO<sub>2</sub> supported boron sulfonic acid as a novel  
magnetically heterogeneous catalyst for the synthesis of pyrano  
coumarins**

Mahnaz Farahi,\* Bahador Karami, Raziye Keshavarz and Foroogh Khosravian

Department of Chemistry, Yasouj University, Yasouj, Iran

E-mail: farahimb@yu.ac.ir

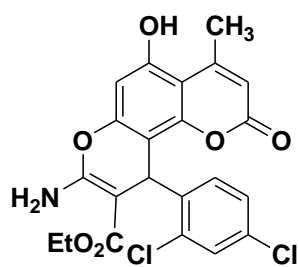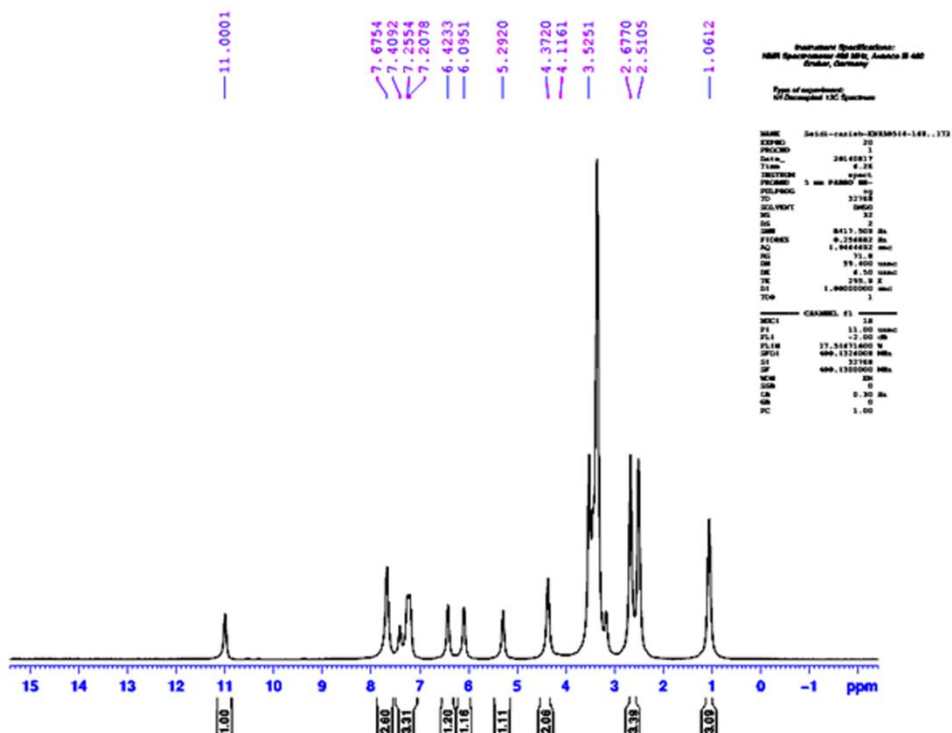

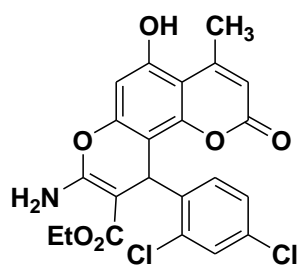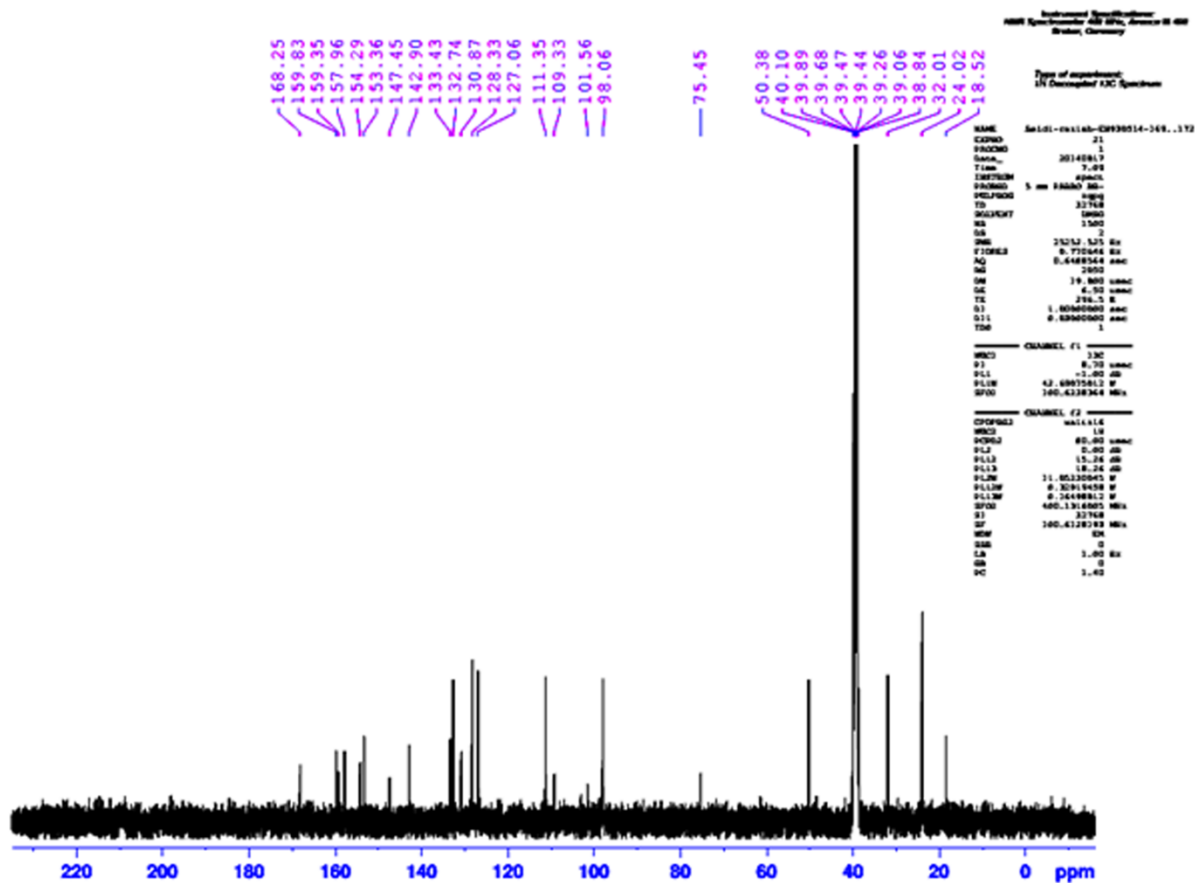

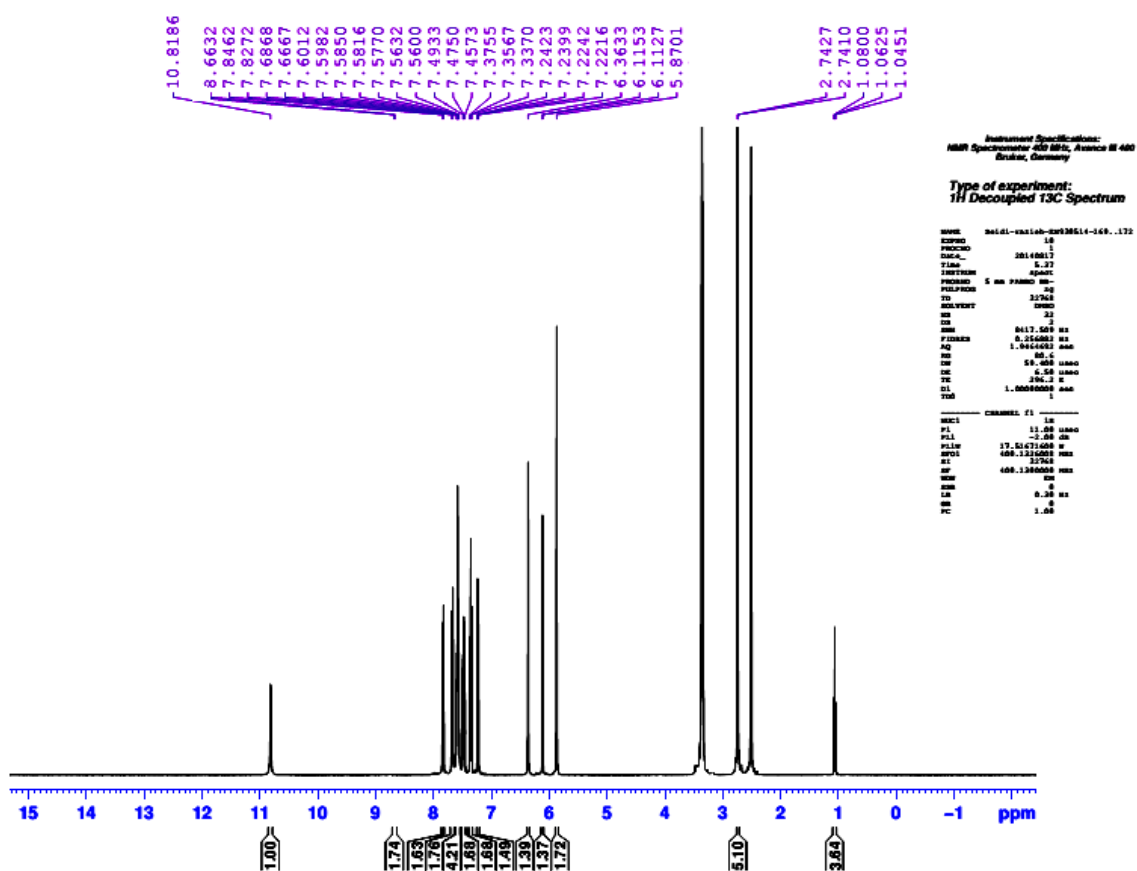



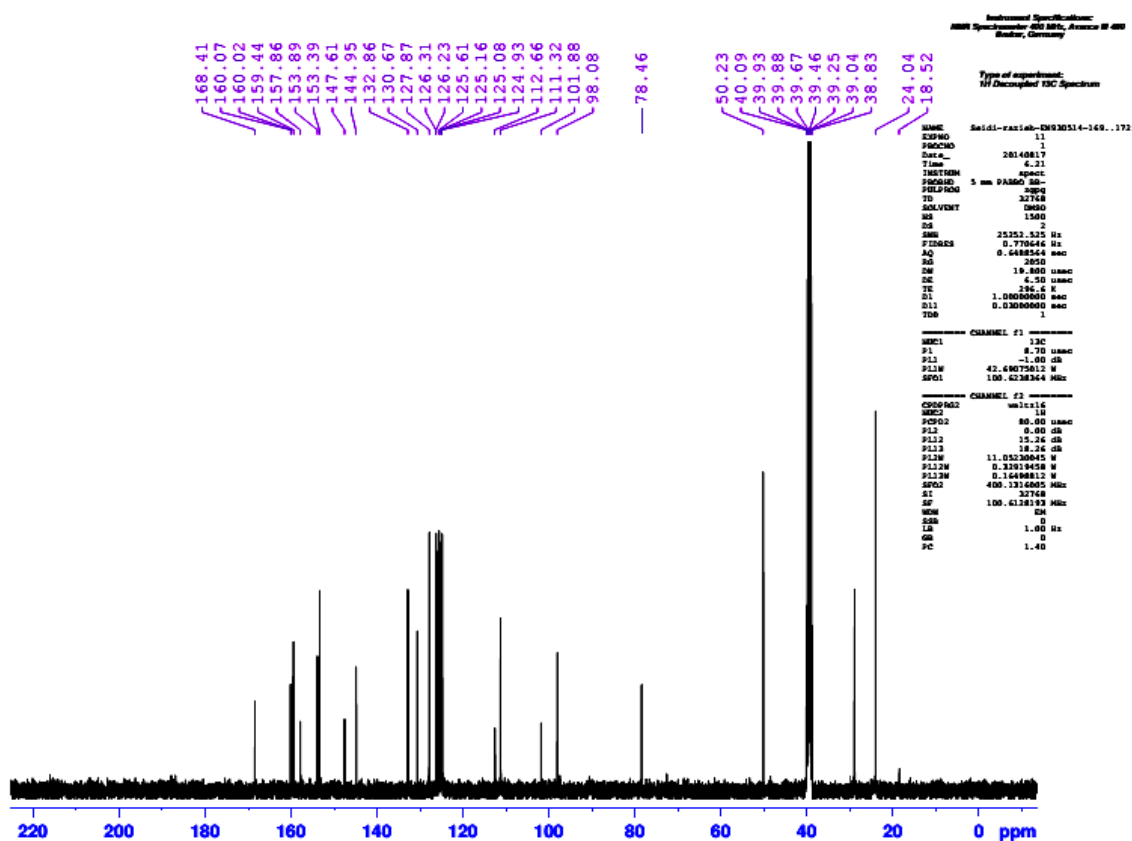

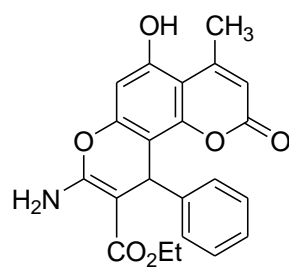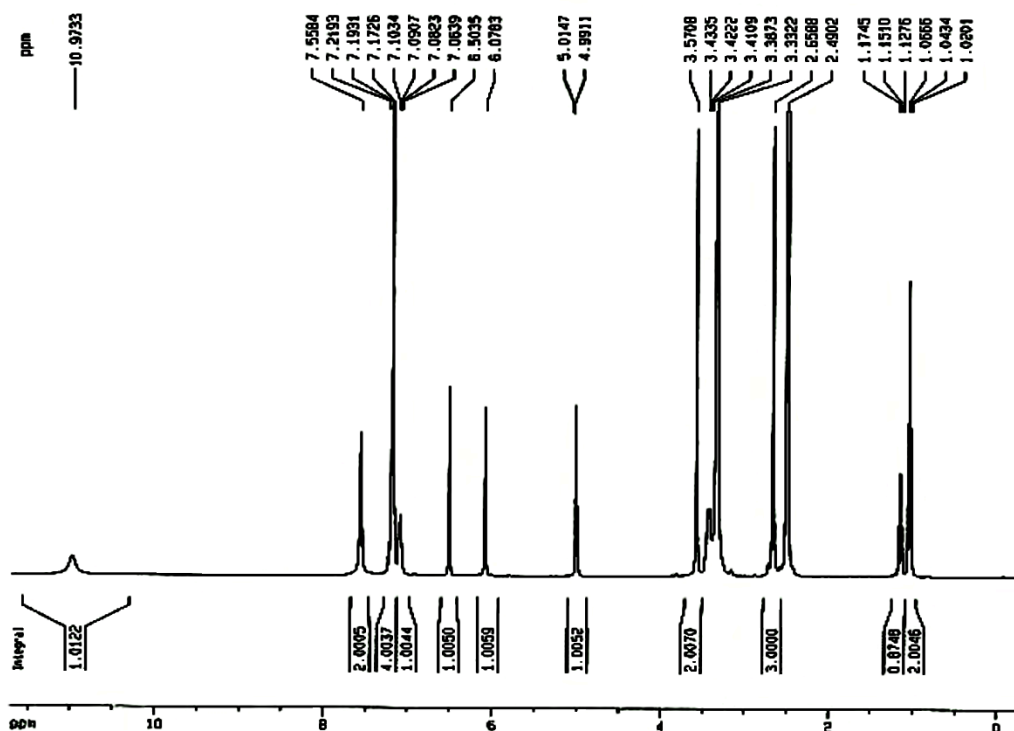

Current Data Parameters  
NAME yabouj  
EXPNO 60  
PROCNO 1

F2 - Acquisition Parameters  
Date\_ 20140706  
Time 15.40  
INSTRUM spect  
PROBHD 5 mm Multinucl  
PULPROG zg  
TD 32768  
SOLVENT DMSO  
NS 16  
DS 2  
SWH 5995.204 Hz  
FIDRES 0.162959 Hz  
AQ 2.7329011 sec  
RG 228.1  
ON 63.400 usec  
OE 6.00 usec  
TE 300.0 K  
D1 5.00000000 sec

CHANNEL f1 1H  
NUC1 1H  
P1 10.00 usec  
PL1 0.00 dB  
SFO1 300.1320589 MHz

F2 - Processing parameters  
SI 32768  
SF 300.1300047 MHz  
WDW EM  
SSB 0  
LB 0.30 Hz  
GB 0  
PC 1.00

1D NMR plot parameters  
CK 20.00 cm  
CY 45.00 cm  
F1p 11.708 ppm  
F1 3511.52 Hz  
F2p -90.04 ppm  
F2 -90.04 Hz  
P1pCH 0.60000 ppm/cm  
HZCH 180.07799 Hz/cm

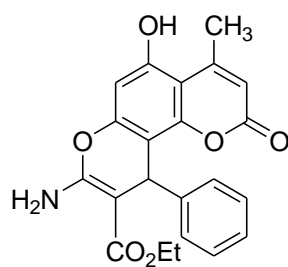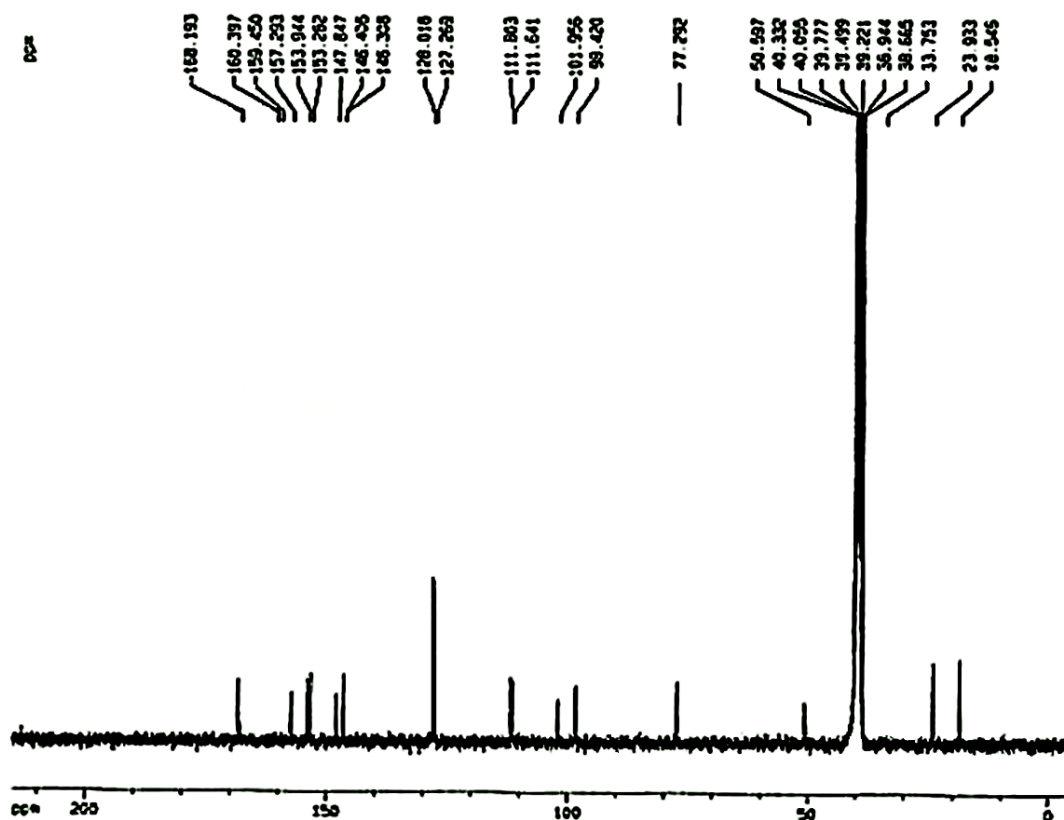

Current Data Parameters  
NAME: 20140706  
EXPNO: 1  
PROCNO: 1

F2 - Acquisition Parameters  
Date\_: 20140706  
Time: 19:22  
INSTRUM: spect  
PROBHD: 5 mm HLLHNP1  
PULPROG: zgpg30  
TD: 32768  
SOLVENT: CDCl3  
NS: 10240  
DS: 4  
SWH: 17005.631 Hz  
FIDRES: 0.346877 Hz  
AQ: 0.9180004 sec  
RG: 819.2  
DQ: 27.000 umax  
RQ: 0.00 umax  
PQ: 300.0 Hz  
DI: 7.0000000 sec  
D11: 0.0200000 sec  
D12: 0.0002000 sec

===== CHANNEL f1 =====  
NUC1: 13C  
P1: 7.00 umax  
PL1: -0.00 dB  
SFO1: 75.475453 MHz

===== CHANNEL f2 =====  
CPDPRG2: zgpg30  
NUC2: 1H  
PCPD2: 00.00 umax  
PL2: 0.00 dB  
PL12: 21.00 dB  
PL13: 21.00 dB  
SFO2: 100.626095 MHz

F2 - Processing Parameters  
SI: 32768  
SF: 75.475453 MHz  
GB: 0  
LB: 1.00 Hz  
GB: 0  
PC: 1.00

NOISE parameters  
EN: 20.00 dB  
CN: 100.00 dB  
FSP: 275.000 ppm  
F1: 16225.37 Hz  
F2: -3.000 ppm  
F3: -277.34 Hz  
F4: 11.0000 ppm/Hz  
ACQ: 0.00 14563 Hz/Hz

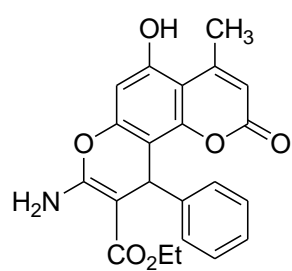

Abundance

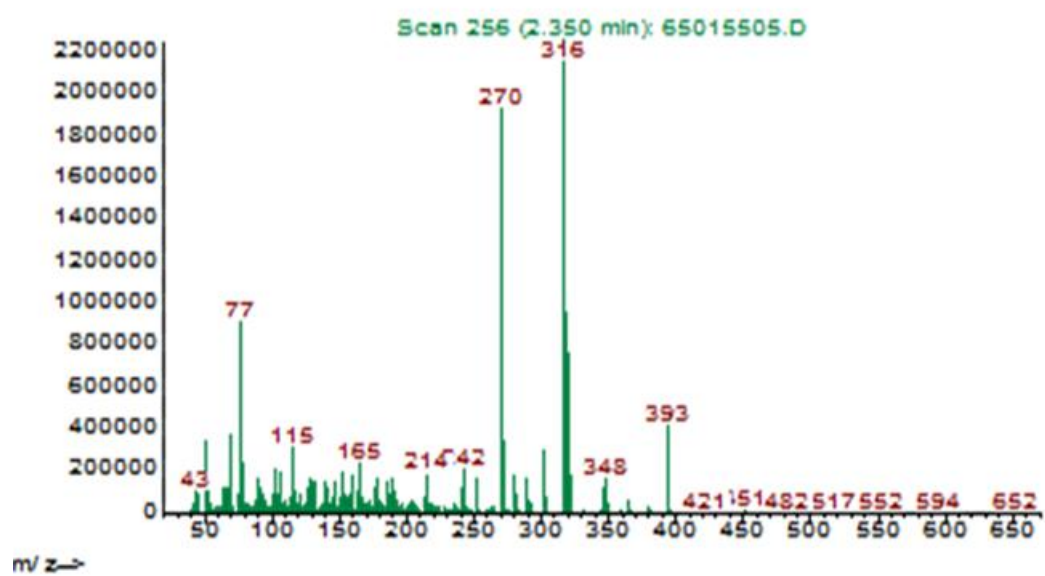

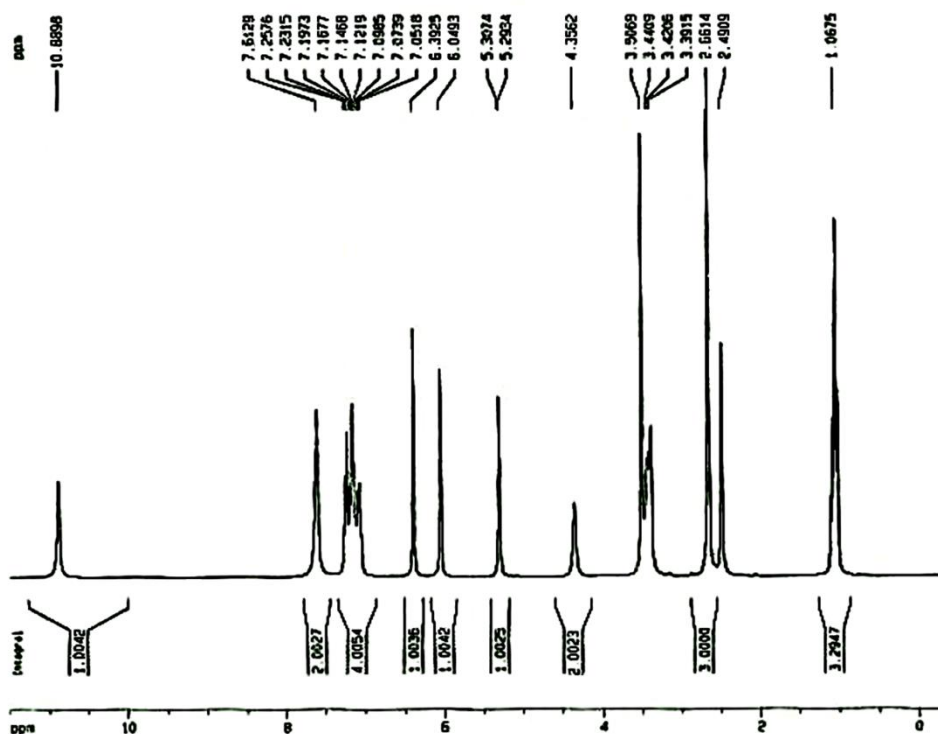

9

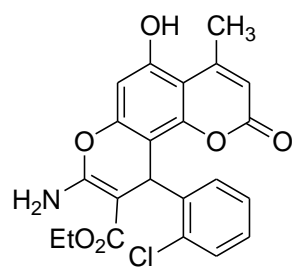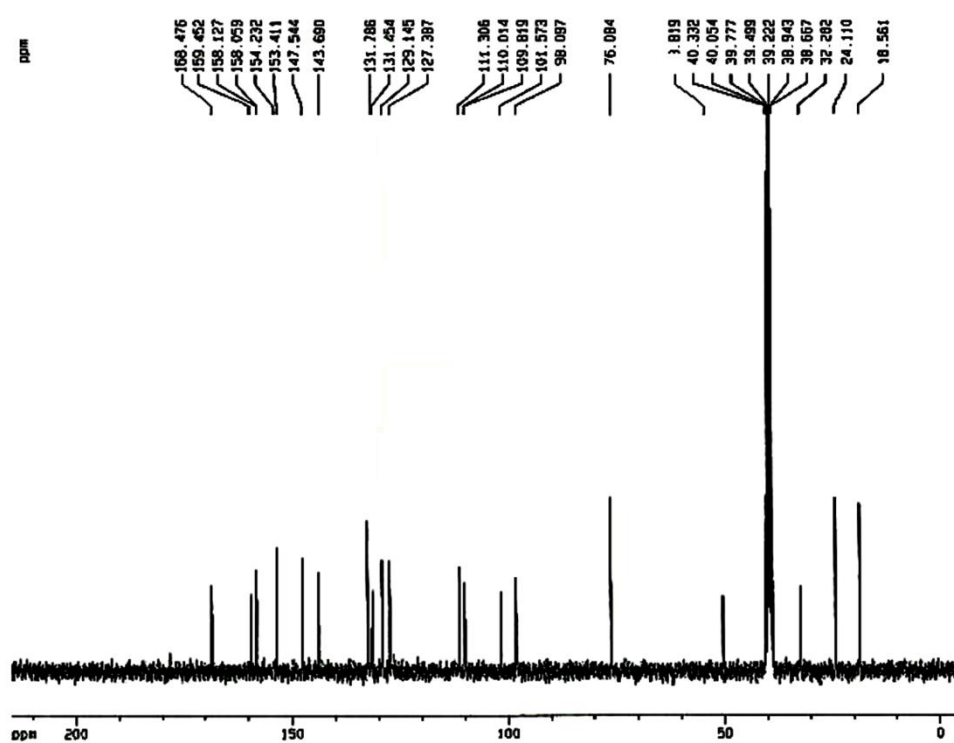

Current Data Parameters  
NAME yssouj  
EXPNO 64  
PROCNO 1

F2 - Acquisition Parameters  
Date\_ 20140708  
Time 16.30  
INSTRUM spect  
PROBHD 5 mm HX119-1  
PULPROG zgpg30  
TD 32768  
SOLVENT DMSO  
NS 250  
DS 4  
SWH 17965.811 Hz  
FIDRES 0.348877 Hz  
AQ 0.9110004 sec  
RG 832  
DT 0.000195 sec  
DE 6.00 umol  
TE 300.0 K  
D1 2.00000000 sec  
d11 0.05000000 sec  
d12 0.00000000 sec

===== CHANNEL f1 =====  
NUC1 13C  
P1 7.00 usec  
PL1 -4.00 dB  
SFO1 75.4752833 MHz

===== CHANNEL f2 =====  
CHPROG2 zgpg30  
NUC2 1H  
PCPRO2 60.00 usec  
PL2 0.00 dB  
PL12 21.00 dB  
PL13 21.00 dB  
SFO2 300.1350652 MHz

F2 - Processing parameters  
SI 65536  
SF 75.4677832 MHz  
WDW EM  
SSB 0  
LB 1.00 Hz  
GB 0  
PC 1.40

10 non plot parameters  
CX 20.00 cm  
CY 25.00 cm  
F1 225.800 ppm  
F2 16526.52 Hz  
F3 -3.000 ppm  
F4 -377.34 Hz  
NUC1 13.00000 ppm/cm  
NUC2 830.14557 Hz/cm

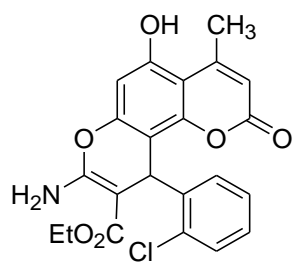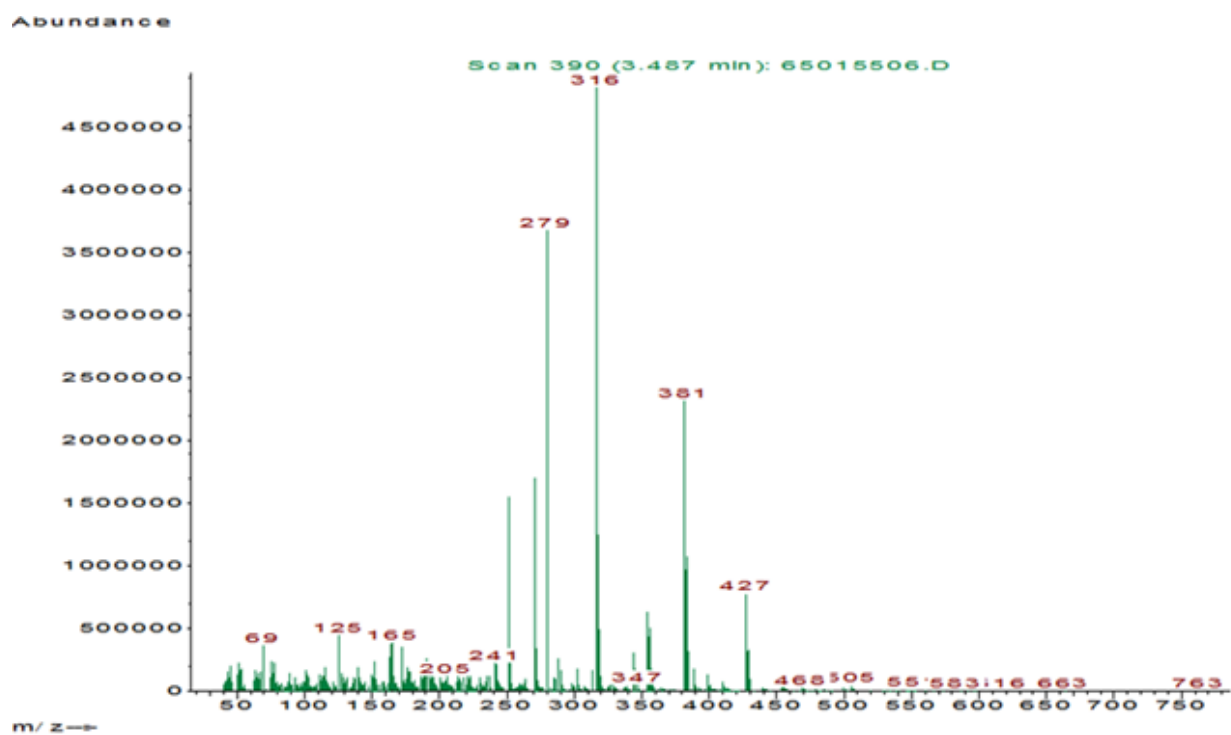

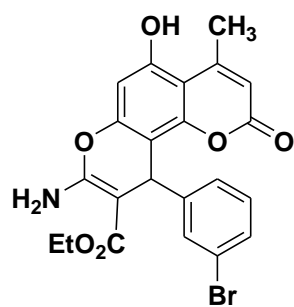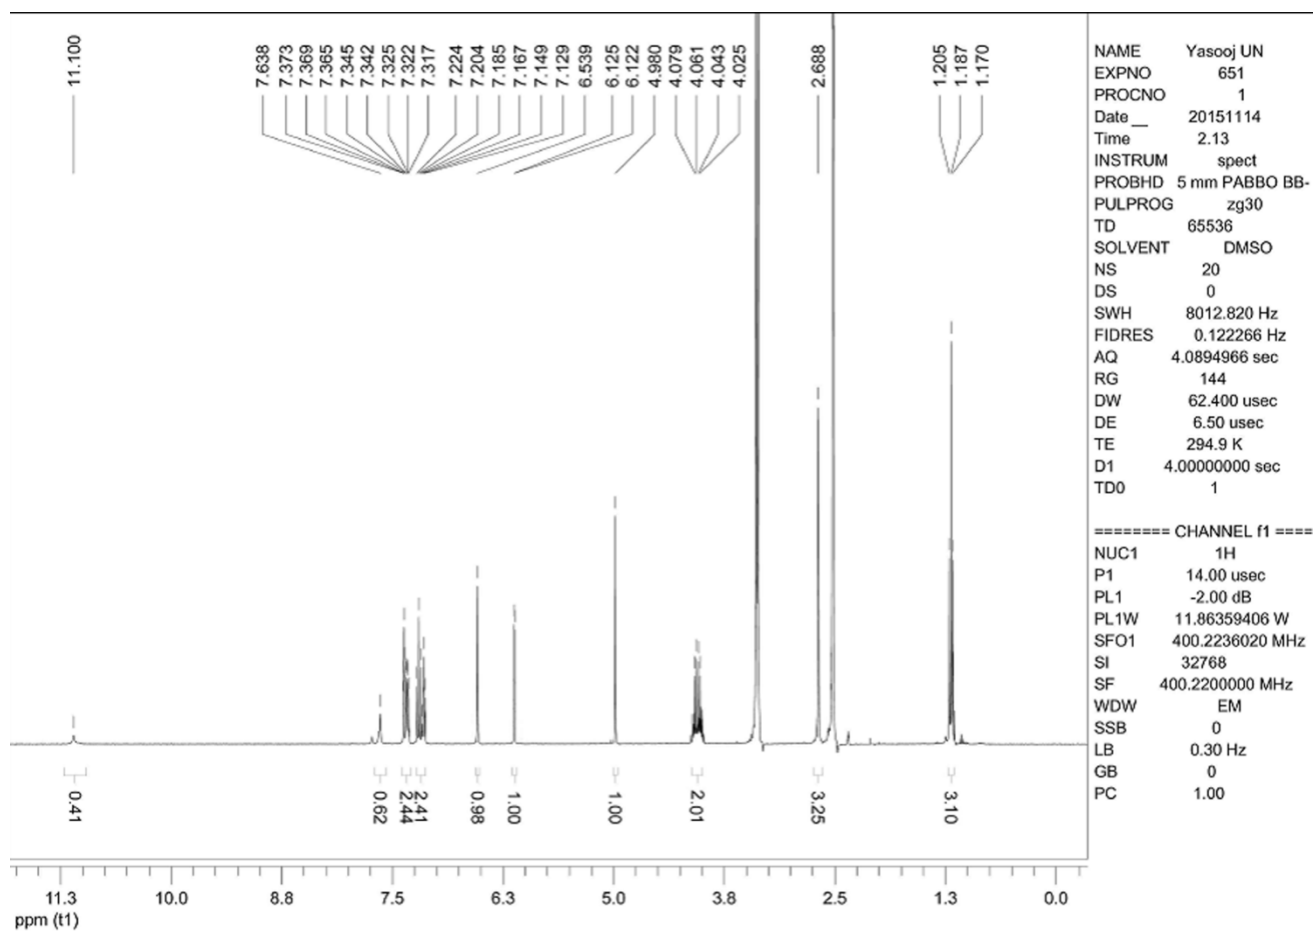



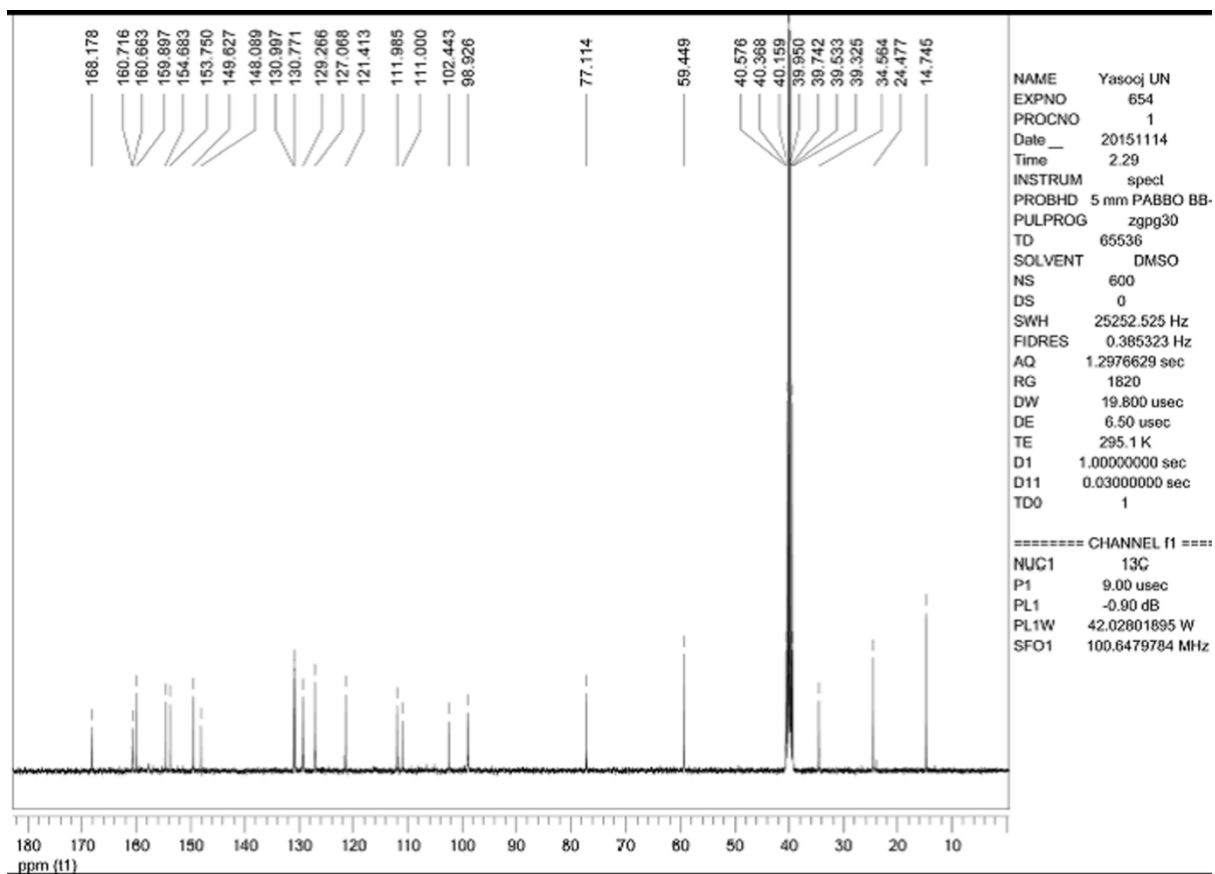

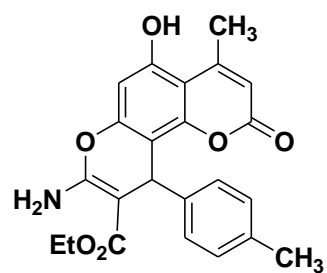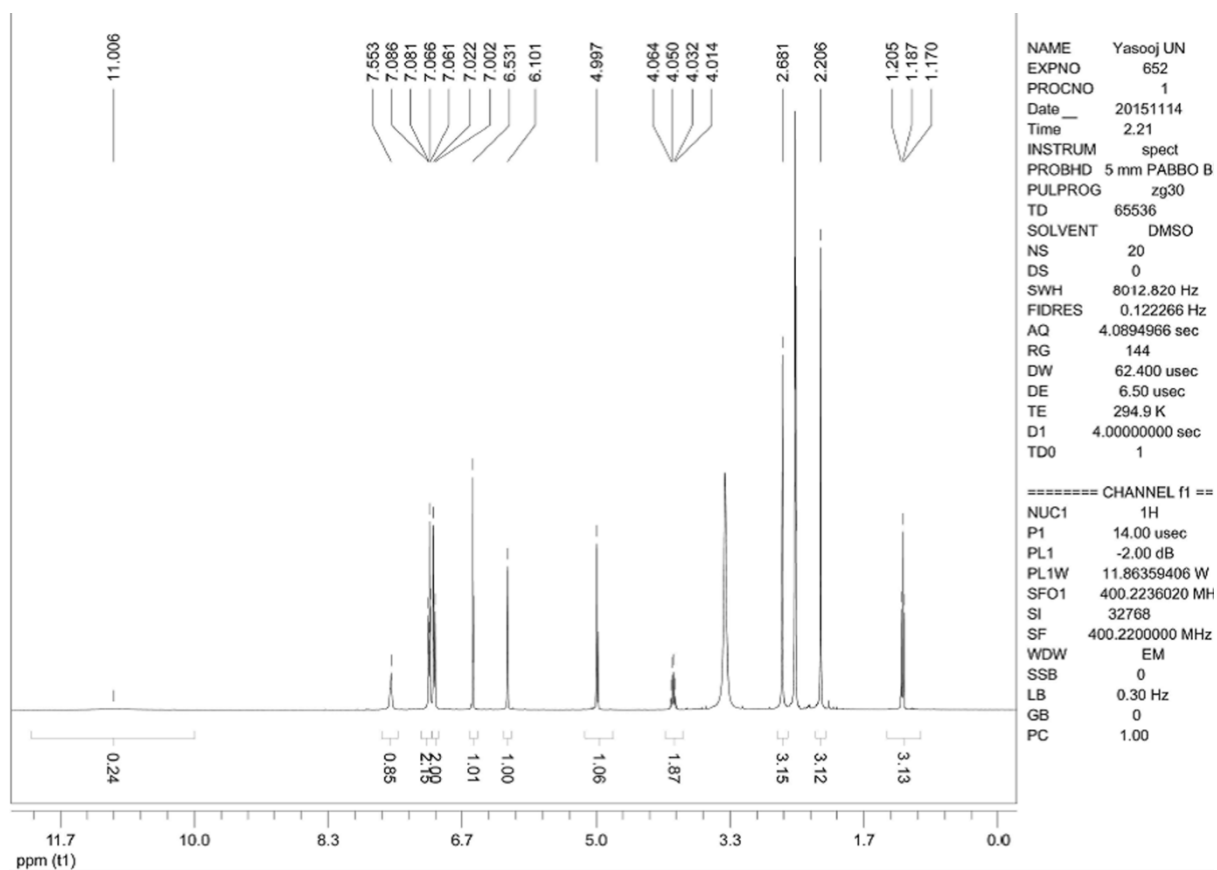

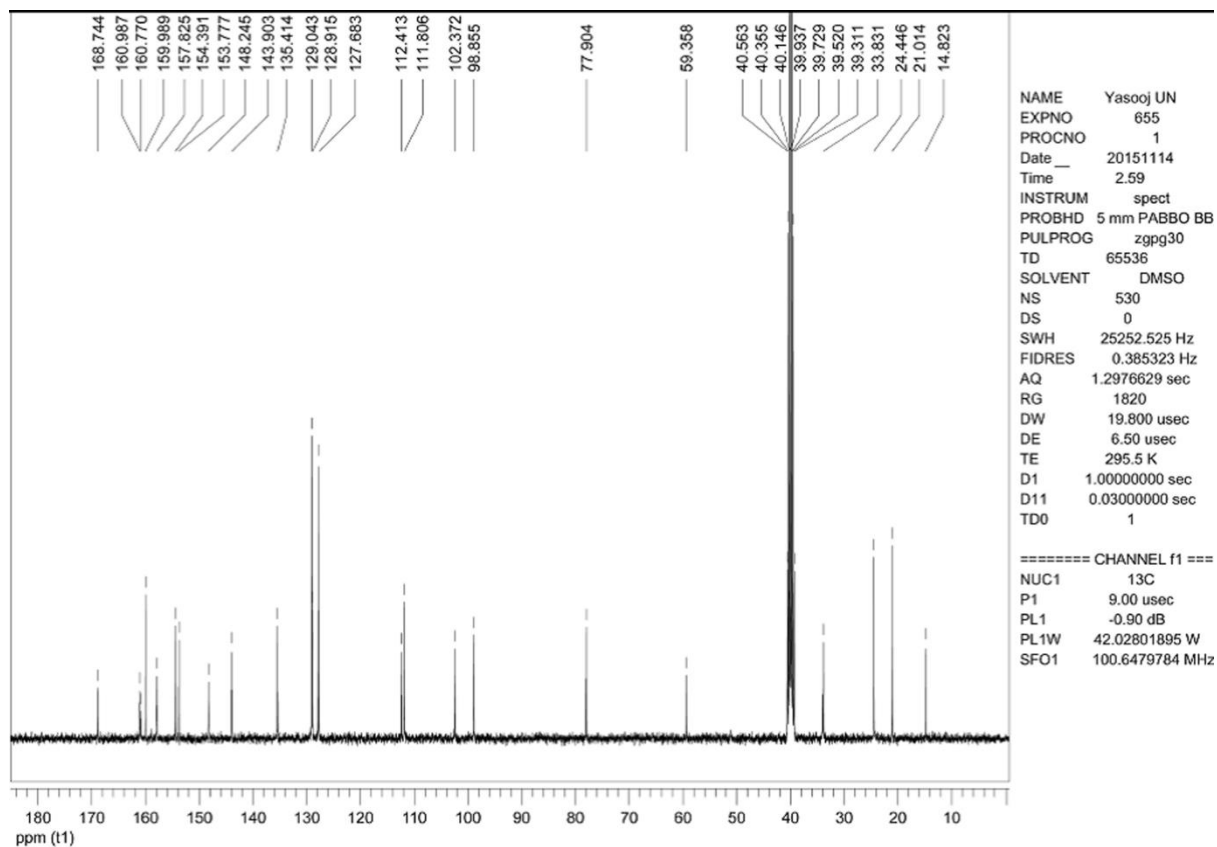

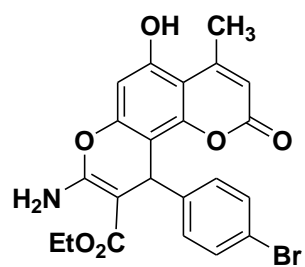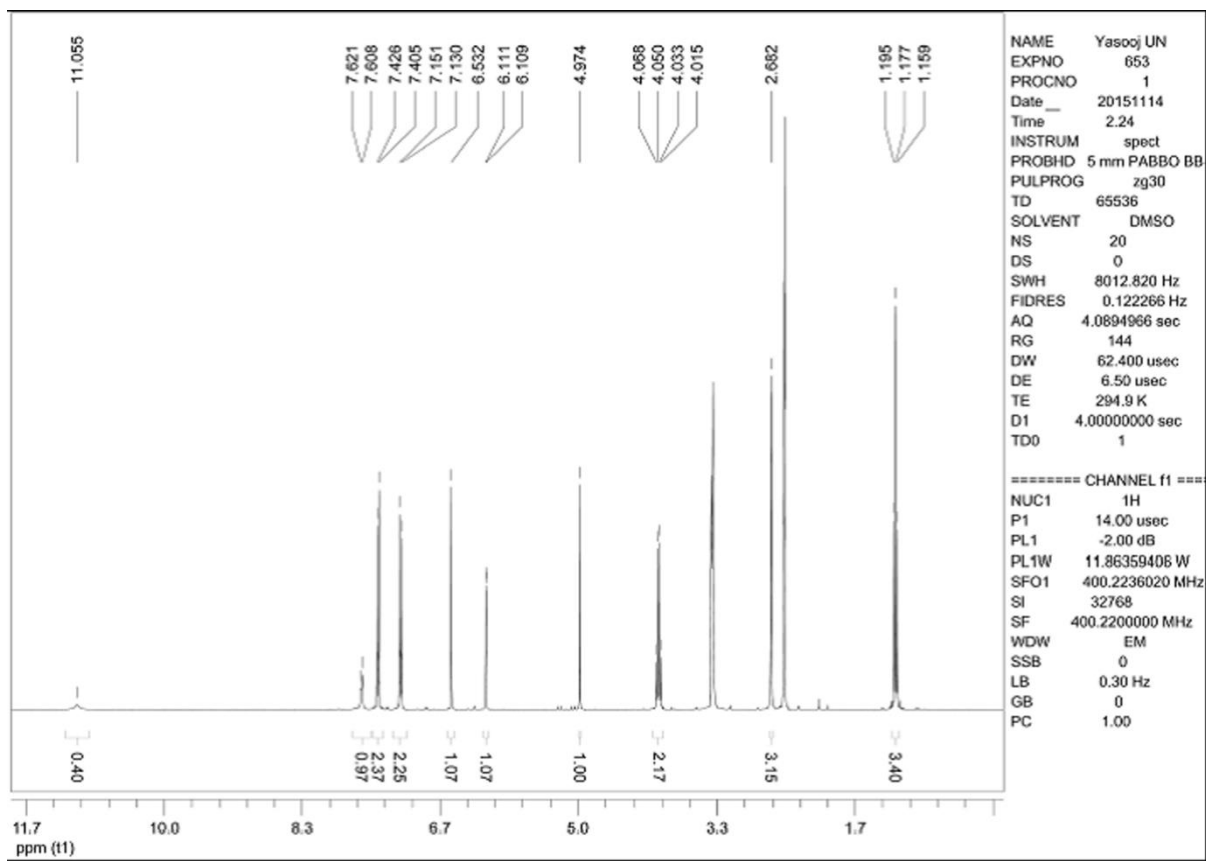

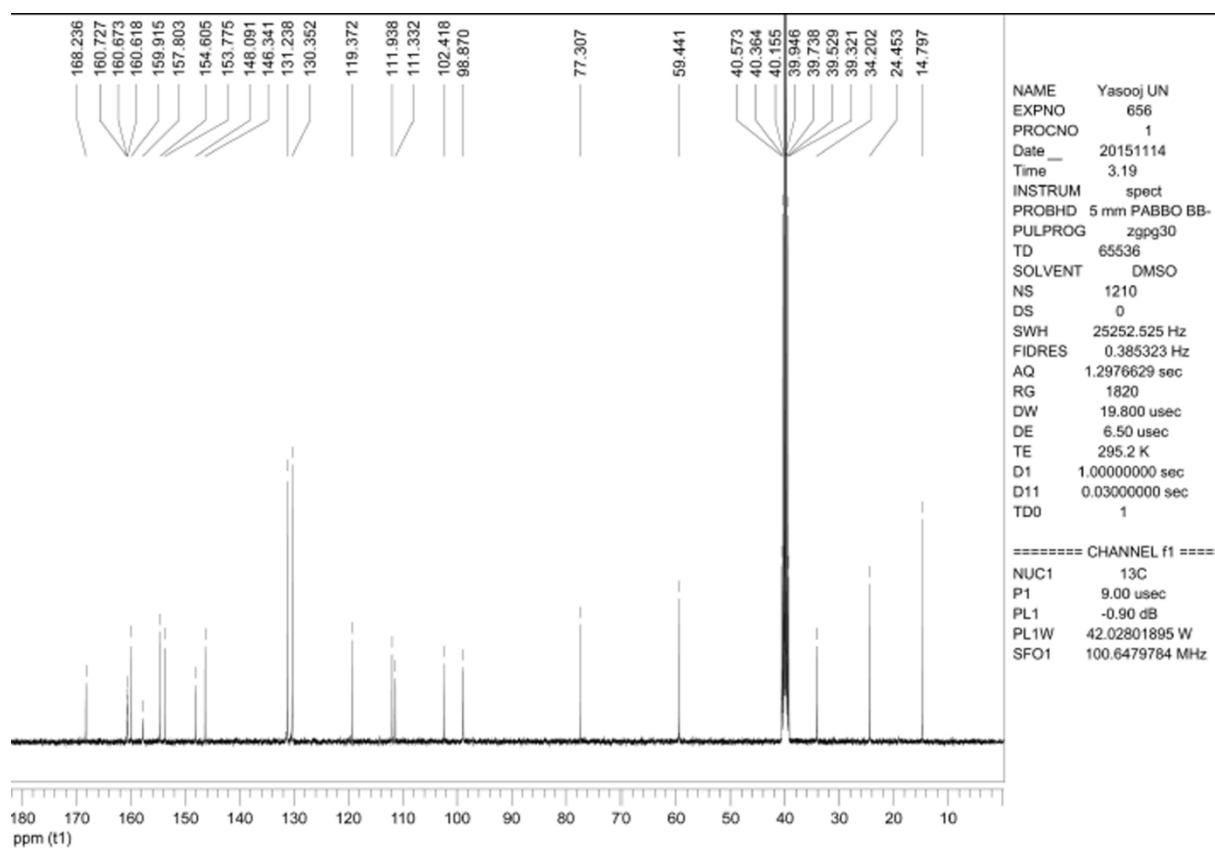

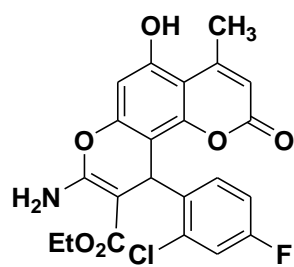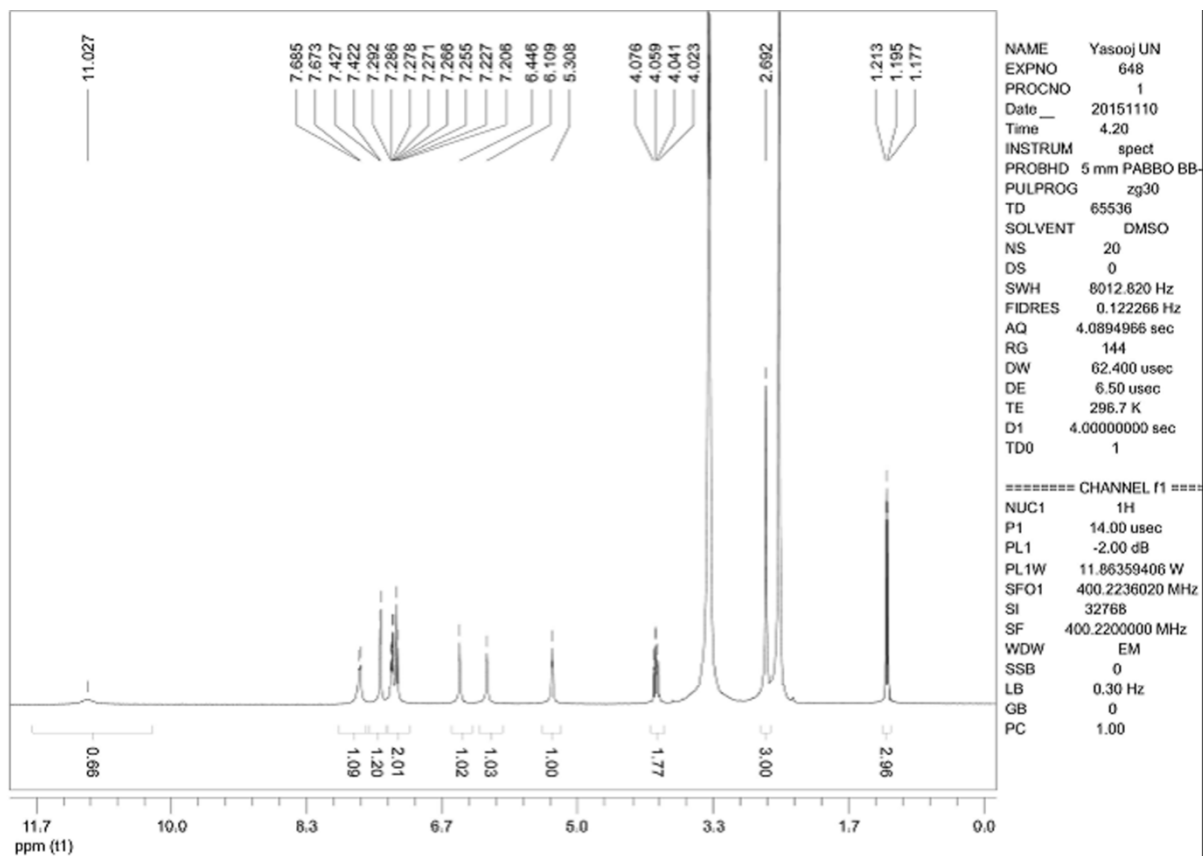

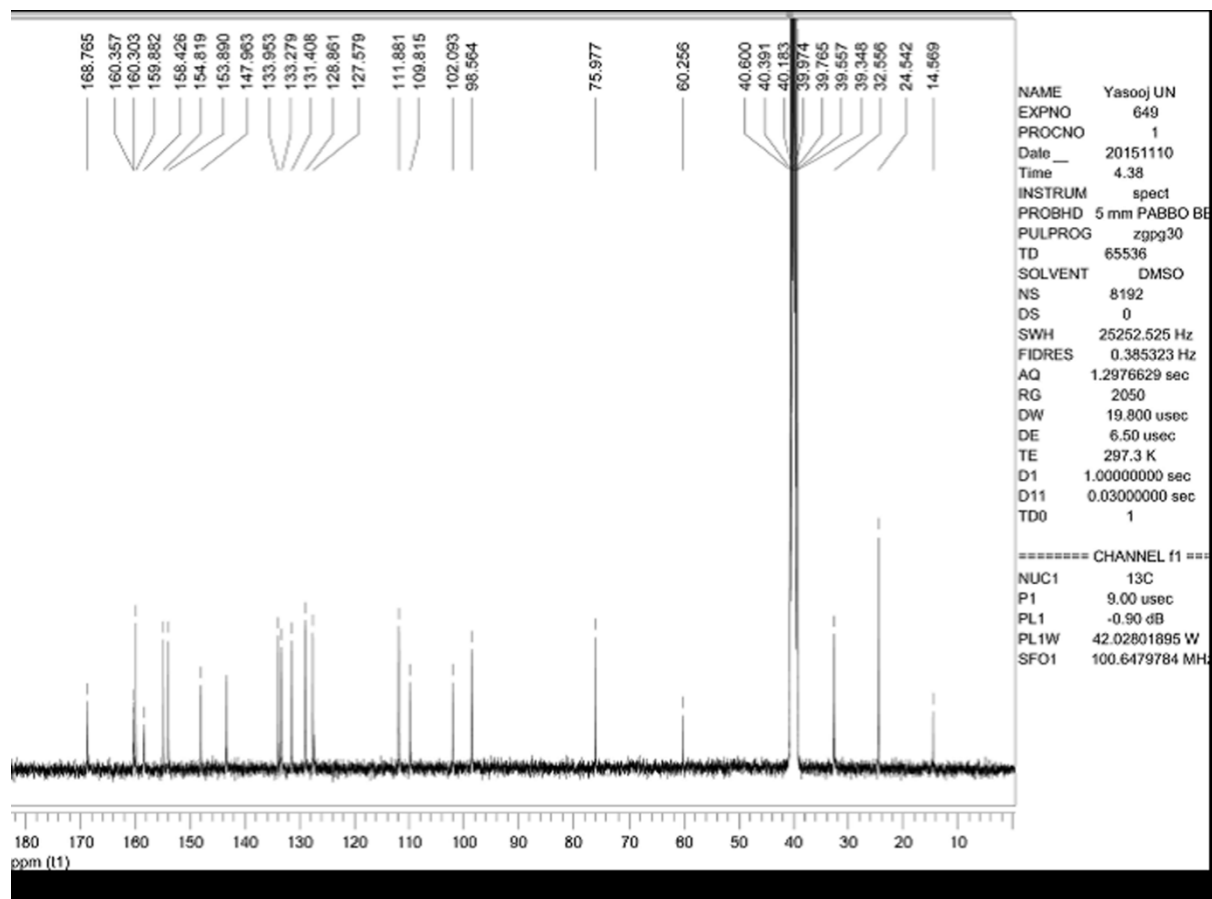

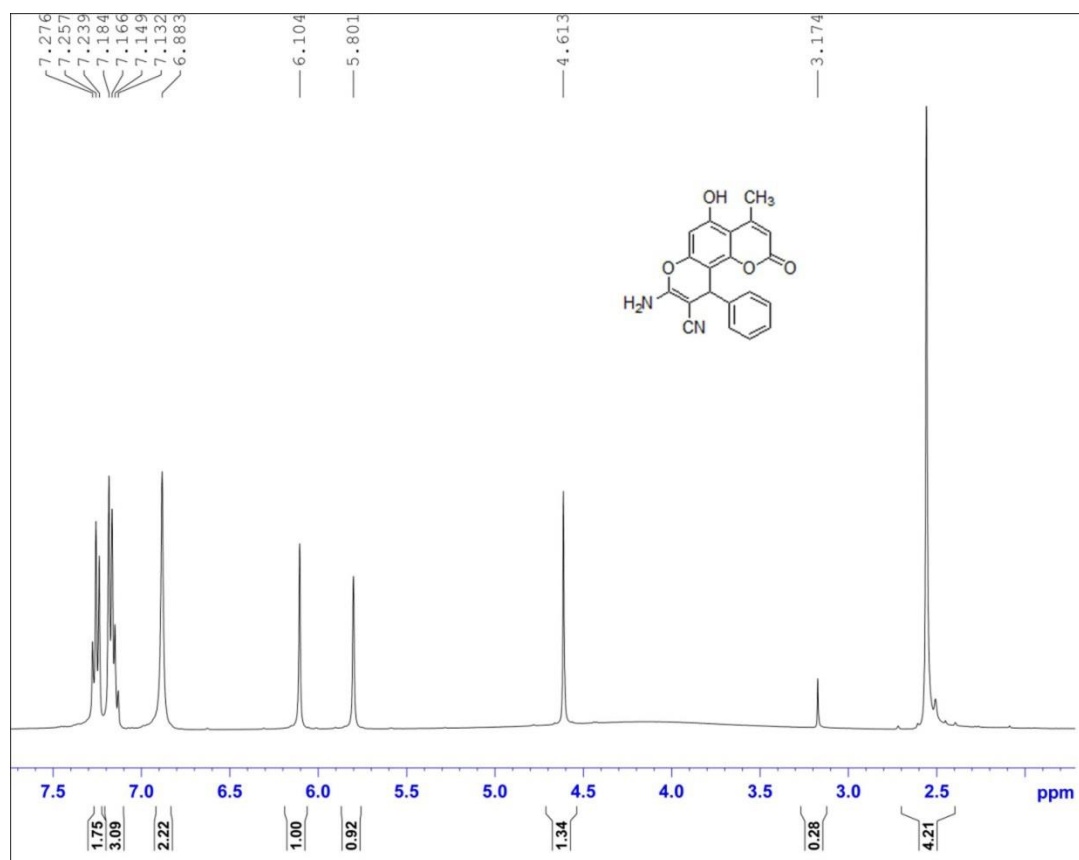



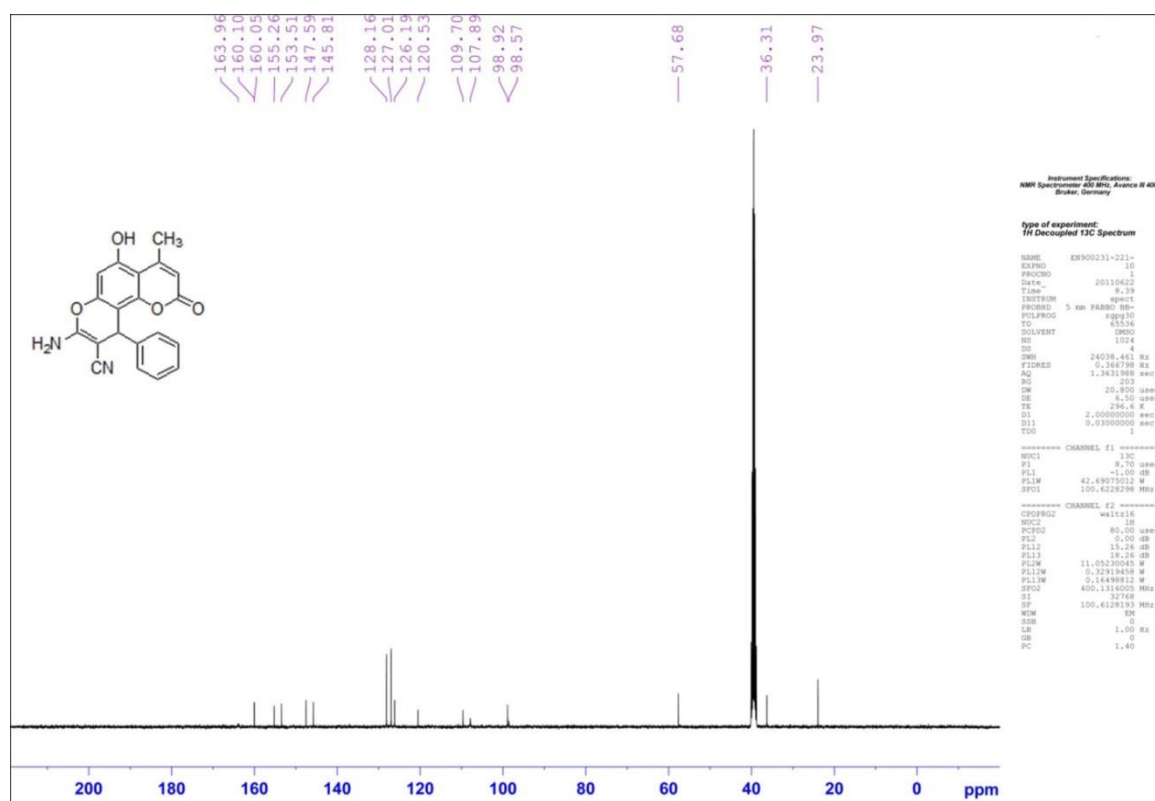

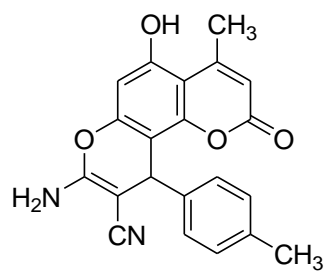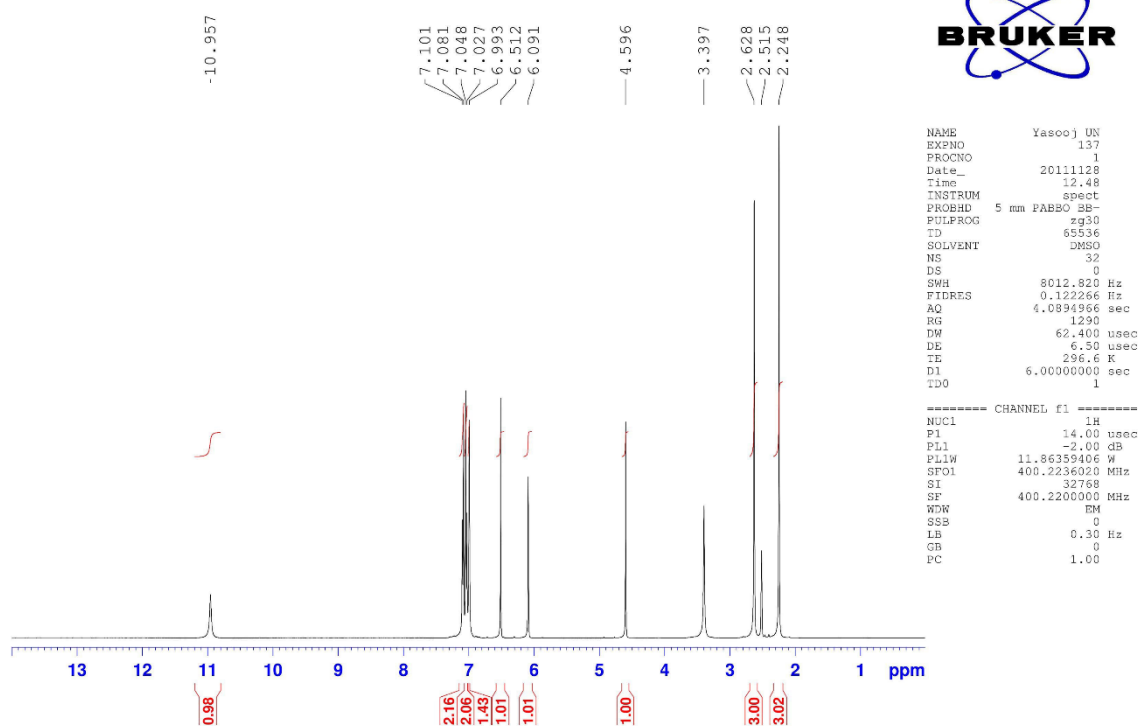

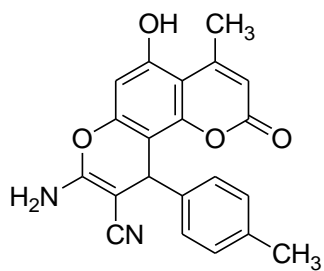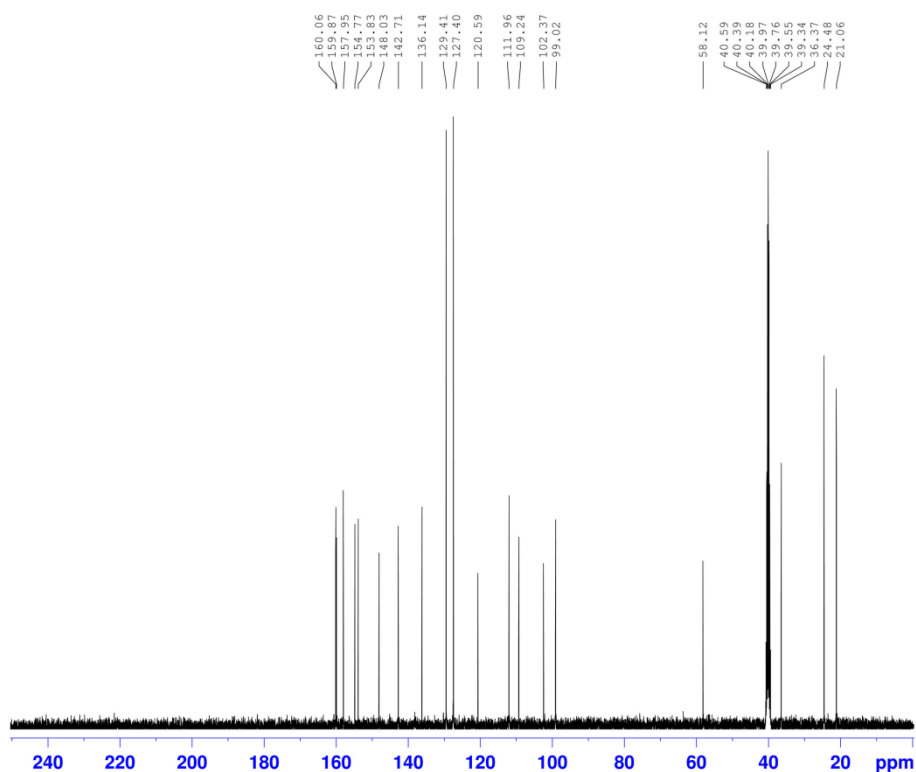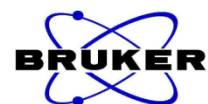

```

NAME      Yasooj UN
EXPNO     150
PROCNO    1
Date_     20111128
Time      15.24
INSTRUM   spect
PROBHD    5 mm PABBO BB-
PULPROG   zgpg
TD         65536
SOLVENT   DMSO
NS         130
DS         0
SWH        25252.525 Hz
FIDRES     0.385323 Hz
AQ         1.2976629 sec
RG         2050
DW         19.800 usec
DE         6.50 usec
TE         297.3 K
D1         3.0000000 sec
D11        0.0300000 sec
TD0        1

===== CHANNEL f1 =====
NUC1       13C
P1         9.00 usec
PL1        -0.90 dB
PL1W       42.02801895 W
SFO1       100.6479784 MHz

===== CHANNEL f2 =====
CPDPRG2    waltz16
NUC2        1H
PCPD2       90.00 usec
PL2         -2.00 dB
PL12        14.16 dB
PL13        17.90 dB
PL2W       11.86359406 W
PL12W       0.28722104 W
PL13W       0.12139934 W
SFO2       400.2216009 MHz
SI          32768
SF         100.6353990 MHz
WDW         EM
SSB         0
LB          1.00 Hz
GB          0
PC          1.40

```

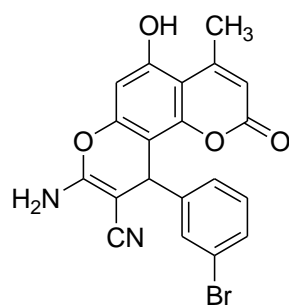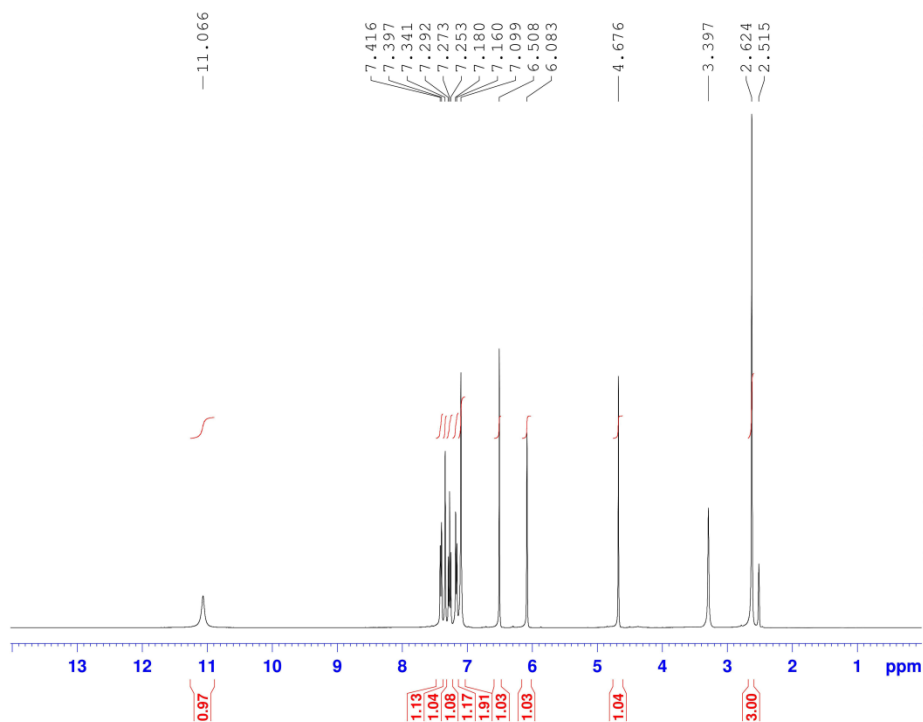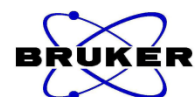

```

NAME      Yasooj UN
EXPNO     138
PROCNO    1
Date_     20111128
Time      12.57
INSTRUM   spect
PROBHD    5 mm PABBO BB-
PULPROG   zg30
TD         65536
SOLVENT   DMSO
NS         32
DS         0
SWH        8012.820 Hz
FIDRES     0.122266 Hz
AQ         4.0894966 sec
RG         1290
DW         62.400 usec
DE         6.50 usec
TE         296.7 K
D1         6.00000000 sec
TD0        1
===== CHANNEL f1 =====
NUC1       1H
P1         14.00 usec
PL1        -2.00 dB
PL1W       11.86359406 W
SFO1       400.2236020 MHz
SI         32768
SF         400.2200000 MHz
WDW        EM
SSB        0
LB         0.30 Hz
GB         0
PC         1.00

```

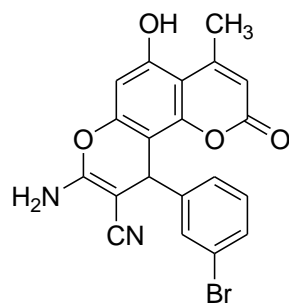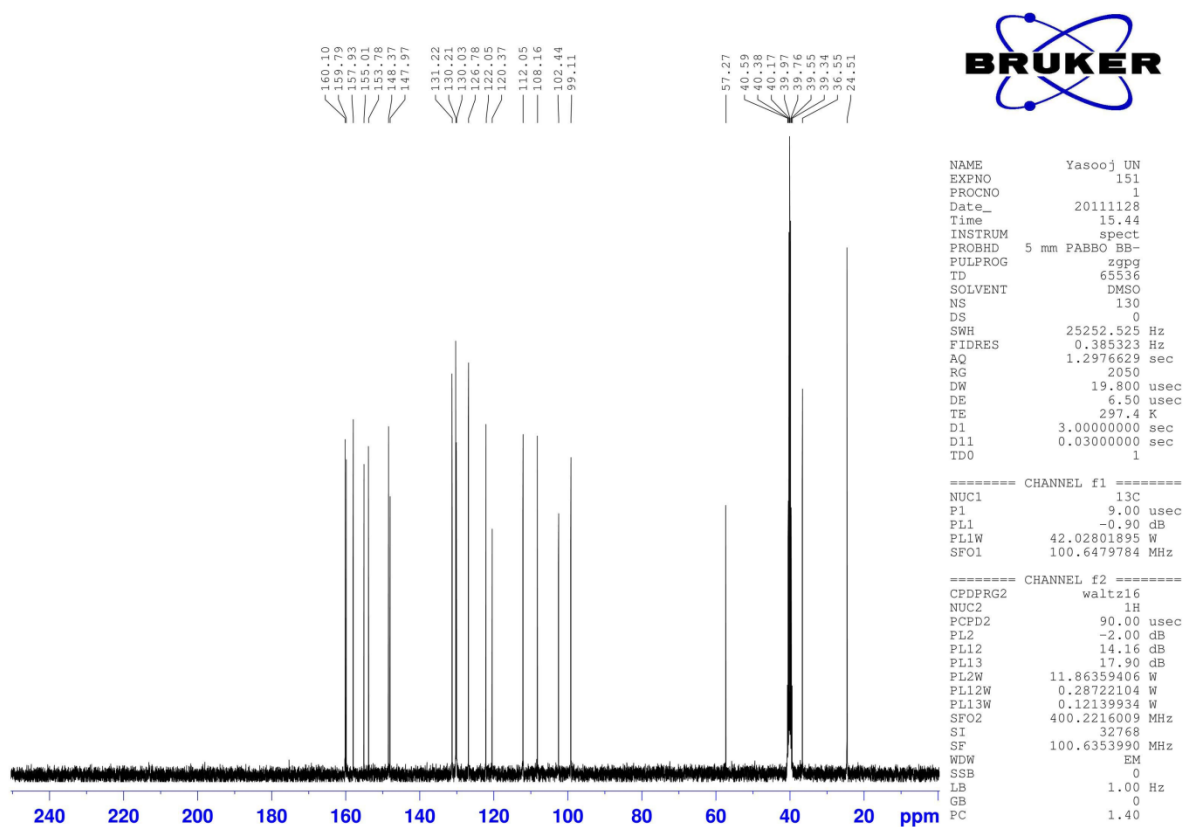

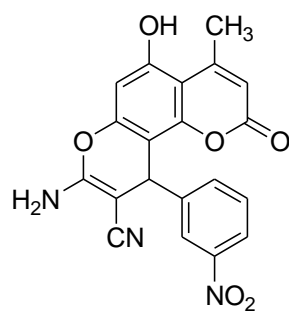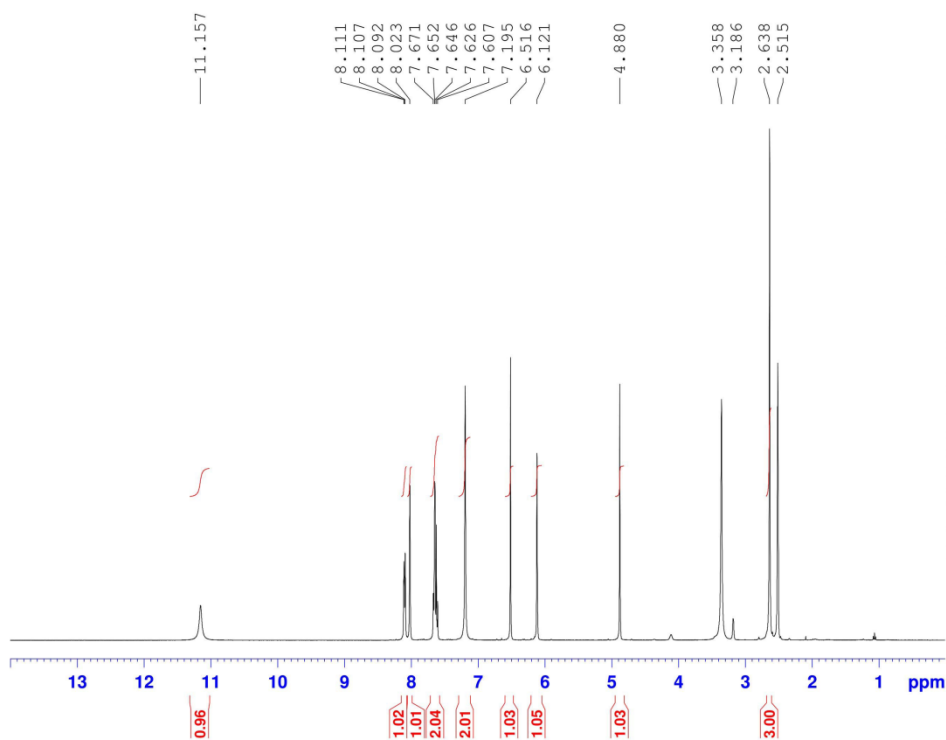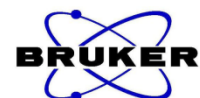

```

NAME      Yasooj UN
EXPNO     139
PROCNO    1
Date_     20111128
Time      13.06
INSTRUM   spect
PROBHD    5 mm PABBO BB-
PULPROG   zg30
TD         65536
SOLVENT   DMSO
NS         32
DS         0
SWH        8012.820 Hz
FIDRES     0.122266 Hz
AQ         4.0894966 sec
RG         2050
DW         62.400 usec
DE         6.50 usec
TE         296.7 K
D1         6.00000000 sec
TD0        1

===== CHANNEL f1 =====
NUC1       1H
P1         14.00 usec
PL1        -2.00 dB
PL1W       11.86359406 W
SF01       400.2236020 MHz
SI         32768
SF         400.2200000 MHz
WDW        EM
SSB        0
LB         0.30 Hz
GB         0
PC         1.00

```

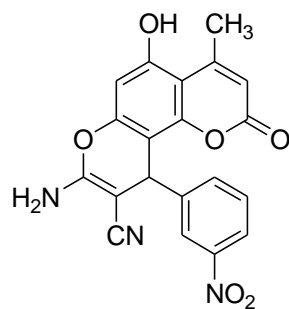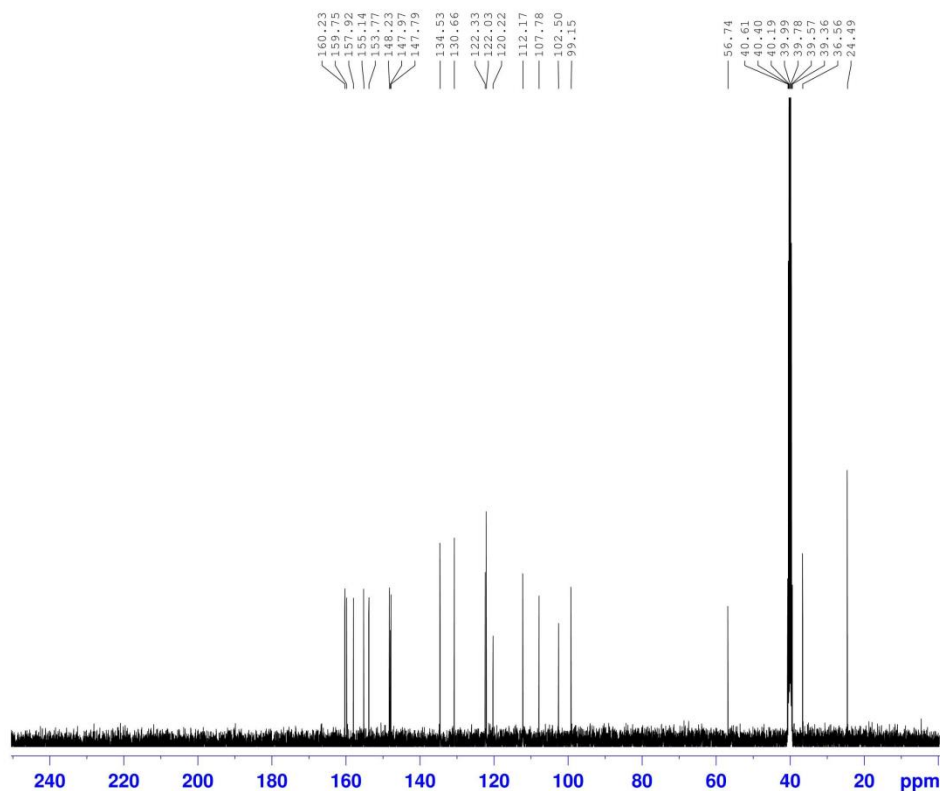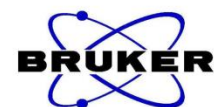

```

NAME      Yasooj UN
EXPNO     152
PROCNO    1
Date_     20111128
Time      15.53
INSTRUM   spect
PROBHD    5 mm PABBO BB-
PULPROG   zgpg
TD         65536
SOLVENT   DMSO
NS         152
DS         0
SWH        25252.525 Hz
FIDRES     0.385323 Hz
AQ         1.2976629 sec
RG         2050
DW         19.800 usec
DE         6.50 usec
TE         297.3 K
D1         3.00000000 sec
D11        0.03000000 sec
TD0        1

===== CHANNEL f1 =====
NUC1       13C
P1         9.00 usec
PL1        -0.90 dB
PL1W       42.02801895 W
SFO1       100.6479784 MHz

===== CHANNEL f2 =====
CPDPRG2    waltz16
NUC2       1H
PCPD2      90.00 usec
PL2        -2.00 dB
PL12       14.16 dB
PL13       17.90 dB
PL2W       11.86359406 W
PL12W      0.28722104 W
PL13W      0.12139934 W
SFO2       400.2216009 MHz
SI         32768
SF         100.6353990 MHz
WDW        EM
SSB        0
LB         1.00 Hz
GB         0
PC         1.40

```

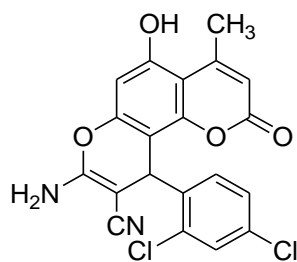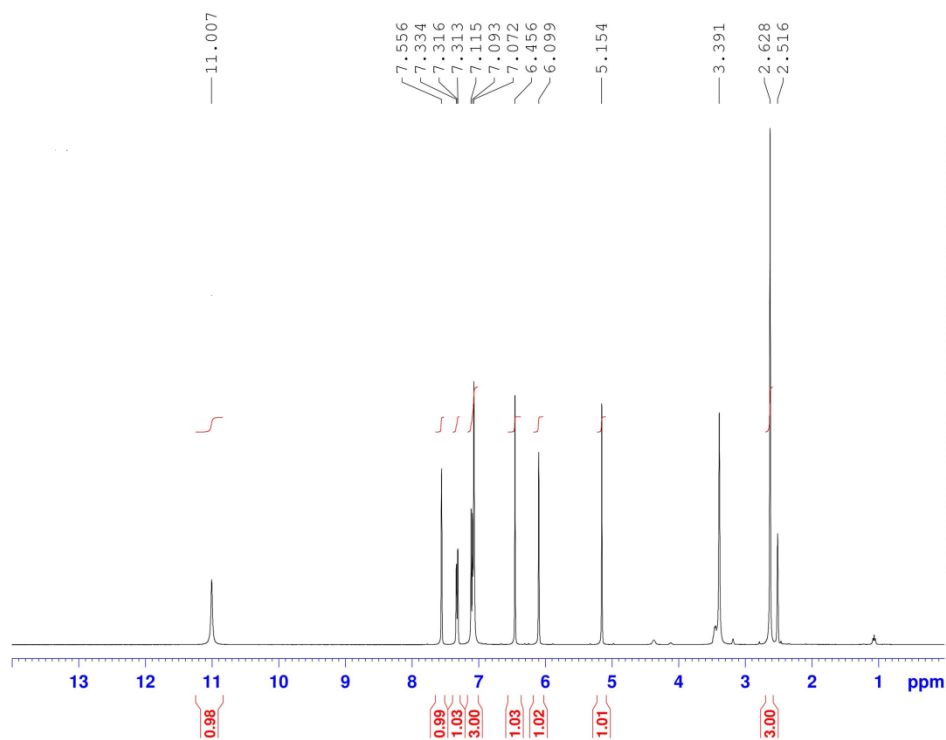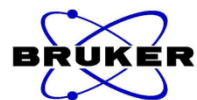

```

NAME      Yasooj UN
EXPNO     140
PROCNO    1
Date_     20111128
Time      13.15
INSTRUM   spect
PROBHD    5 mm PABBO BB-
PULPROG   zg30
TD         65536
SOLVENT   DMSO
NS         32
DS         0
SWH        8012.820 Hz
FIDRES     0.122266 Hz
AQ         4.0894966 sec
RG         1620
DW         62.400 usec
DE         6.50 usec
TE         296.7 K
D1         6.00000000 sec
TD0        1

===== CHANNEL f1 =====
NUC1       1H
P1         14.00 usec
PL1        -2.00 dB
PL1W       11.86359406 W
SFO1       400.2236020 MHz
SI         32768
SF         400.2200000 MHz
WDW        EM
SSB        0
LB         0.30 Hz
GB         0
PC         1.00

```



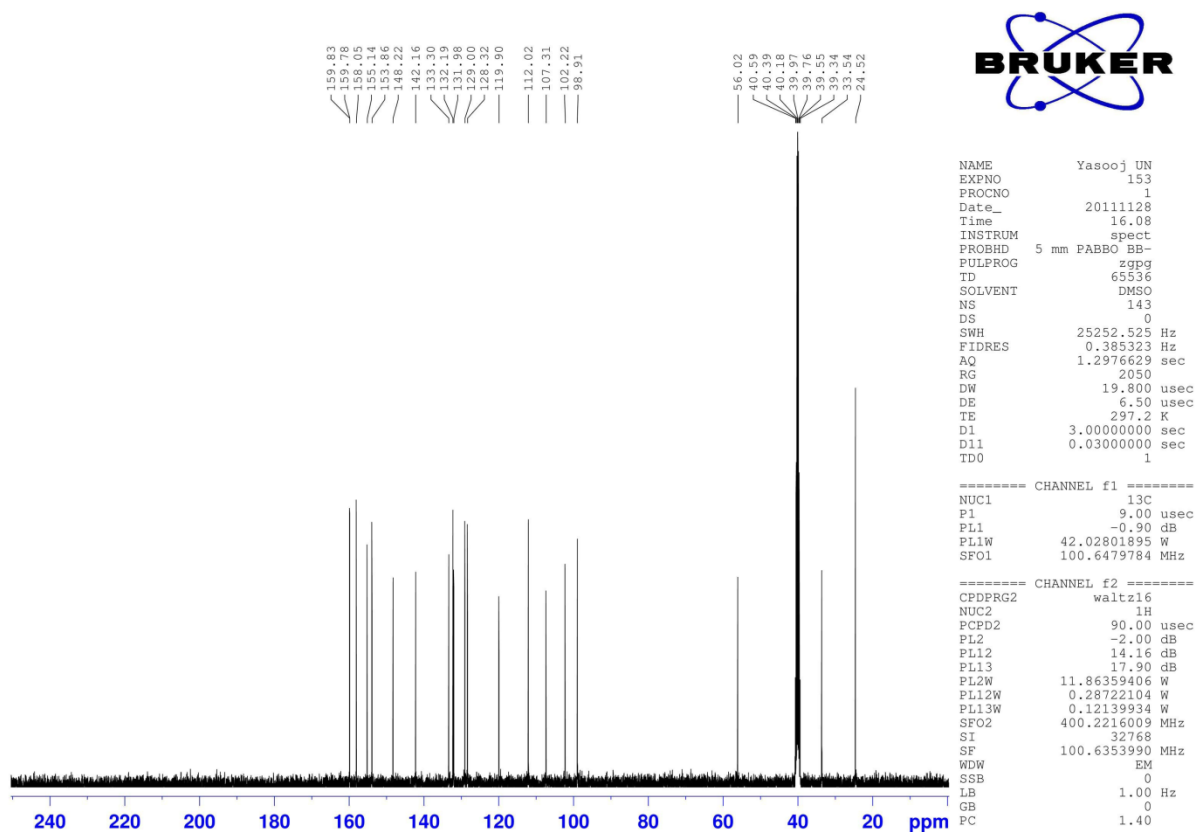

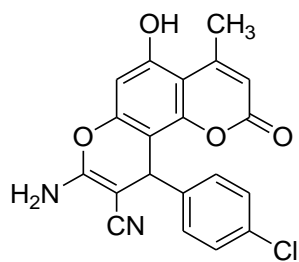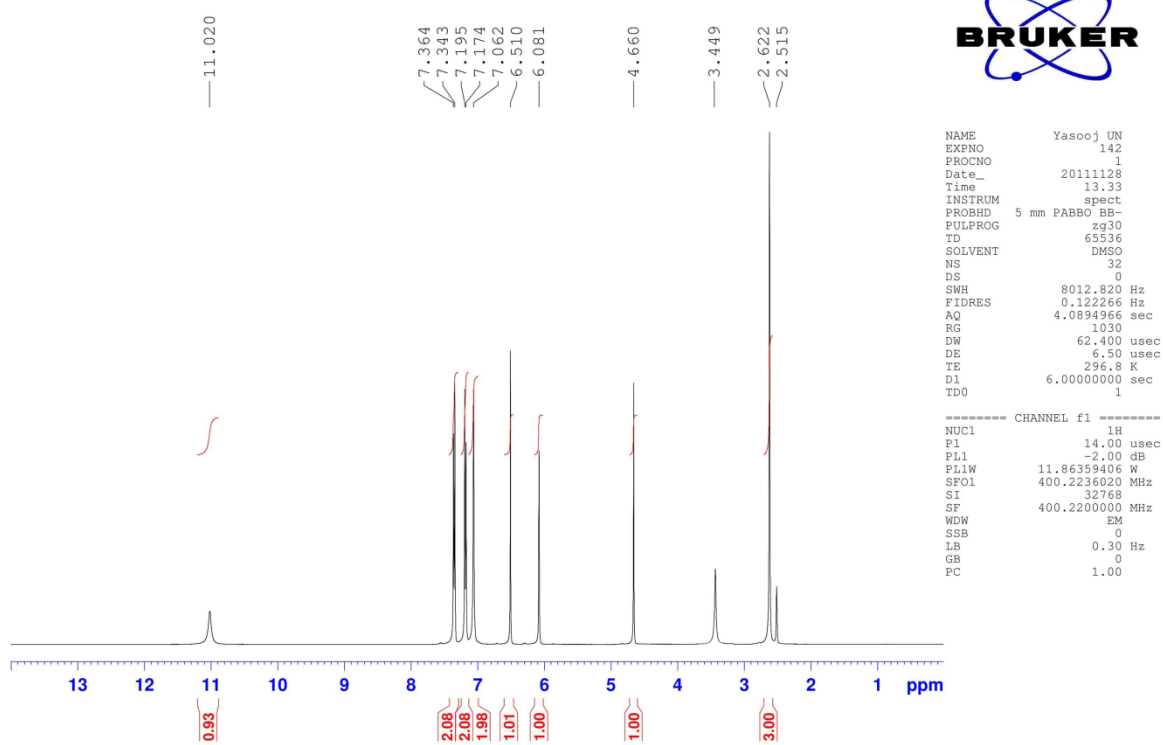

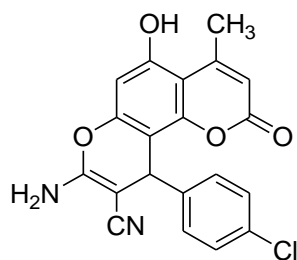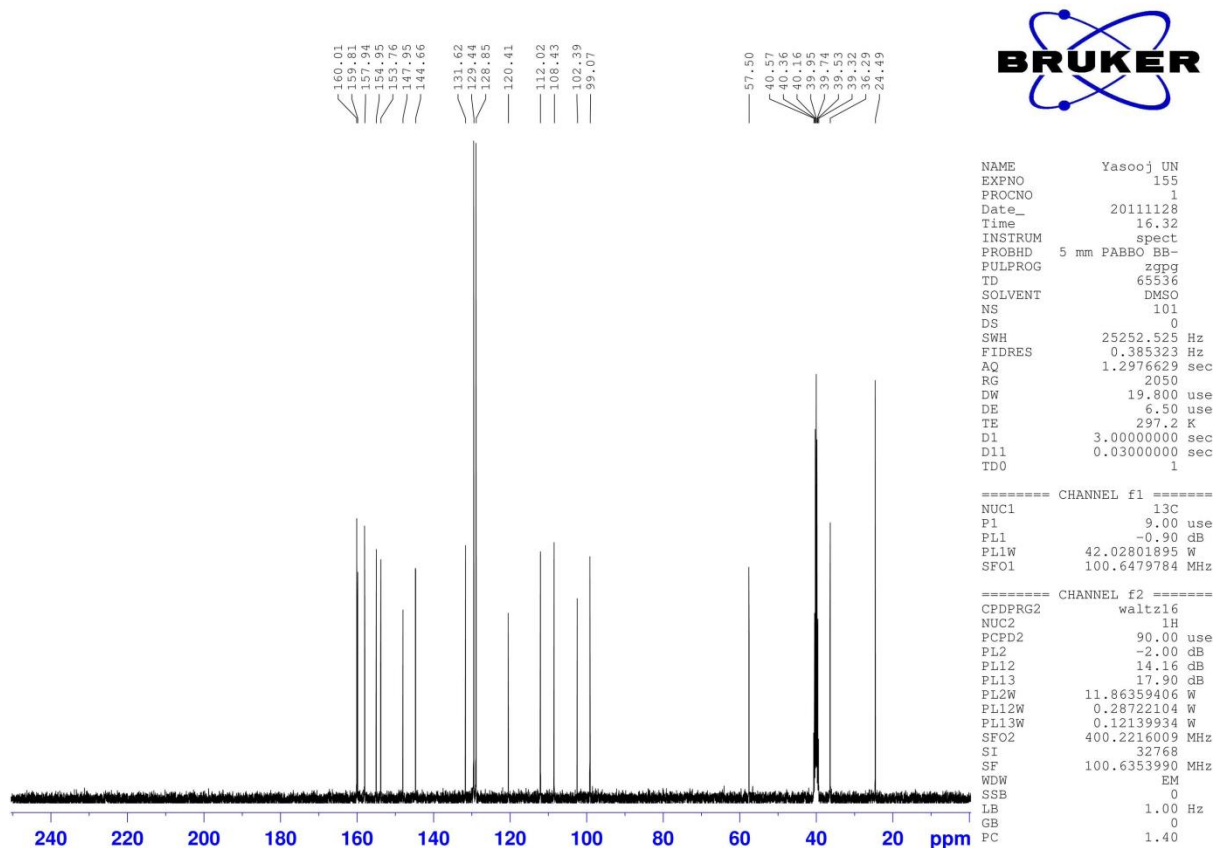

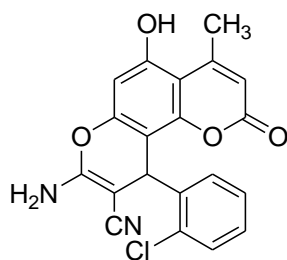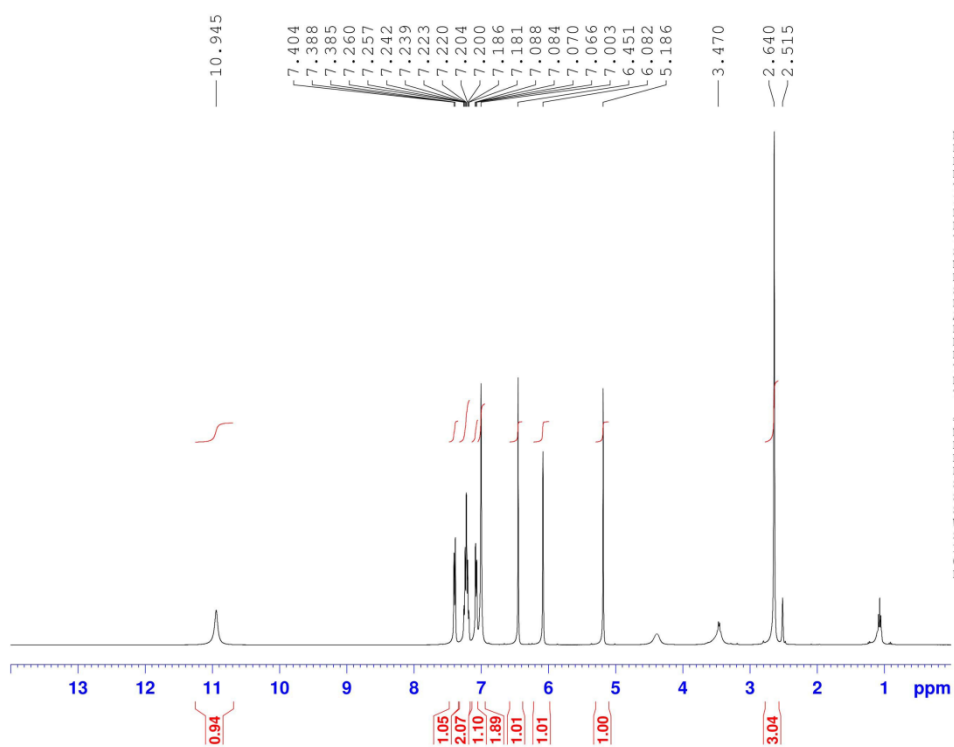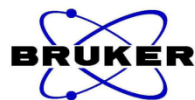

```

NAME      Yasooj UN
EXPNO     143
PROCNO    1
Date_     20111128
Time      13.41
INSTRUM   spect
PROBHD    5 mm PABBO BB-
PULPROG   zg30
TD         65536
SOLVENT   DMSO
NS         32
DS         0
SWH        8012.820 Hz
FIDRES     0.122266 Hz
AQ         4.0894966 sec
RG         144
DW         62.400 usec
DE         6.50 usec
TE         296.9 K
D1         6.00000000 sec
TD0        1

===== CHANNEL f1 =====
NUC1       1H
P1         14.00 usec
PL1        -2.00 dB
PL1W       11.86359406 W
SFO1       400.2236020 MHz
SI         32768
SF         400.2200000 MHz
WDW        EM
SSB        0
LB         0.30 Hz
GB         0
PC         1.00

```

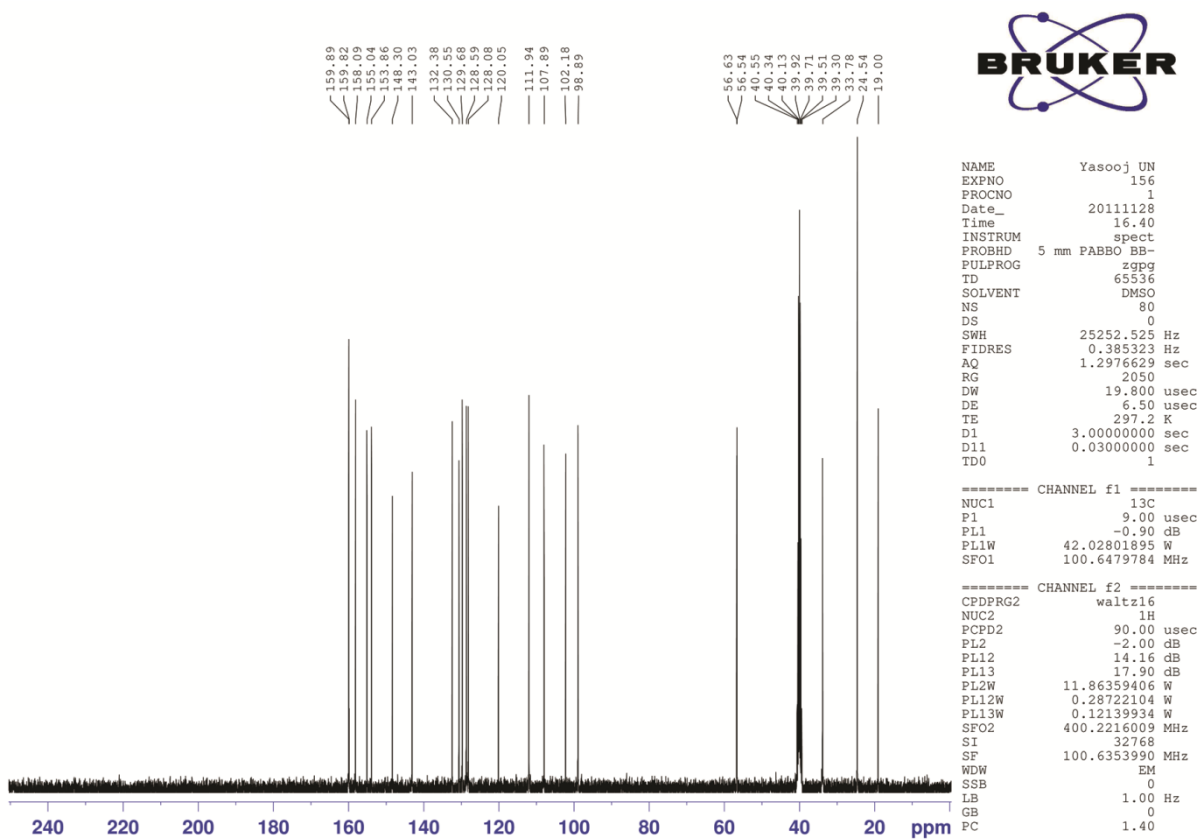

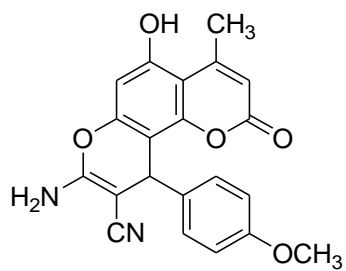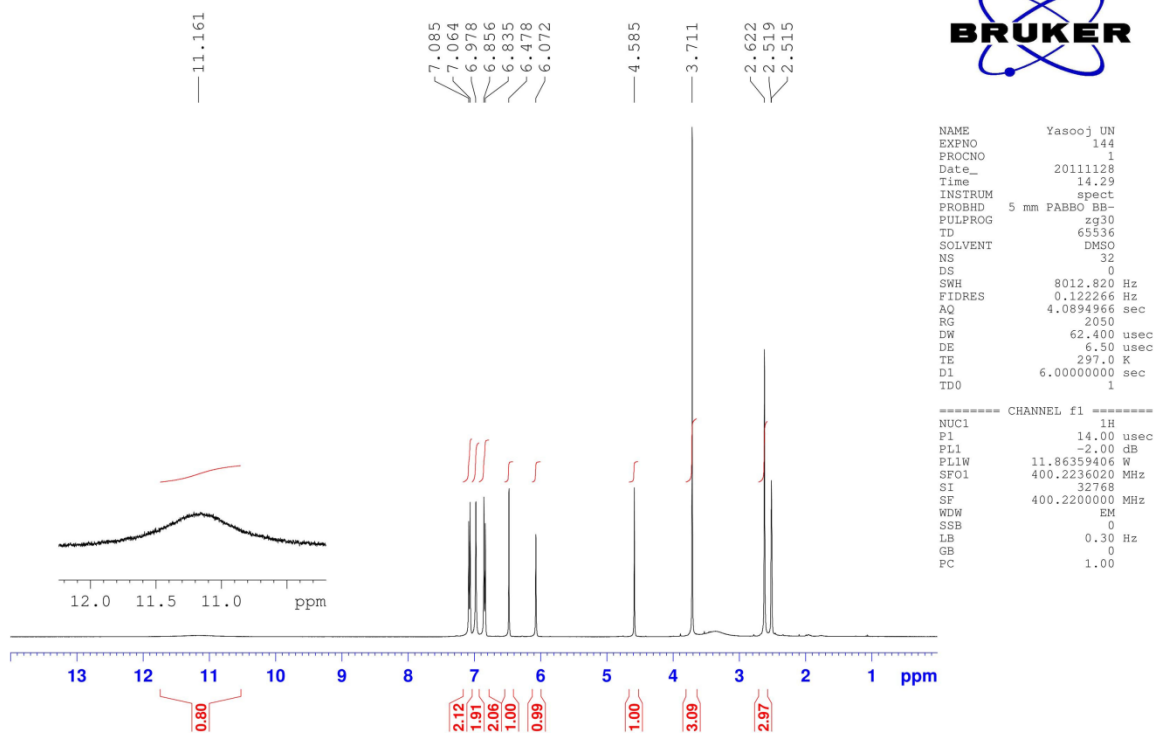

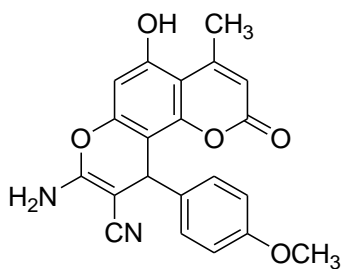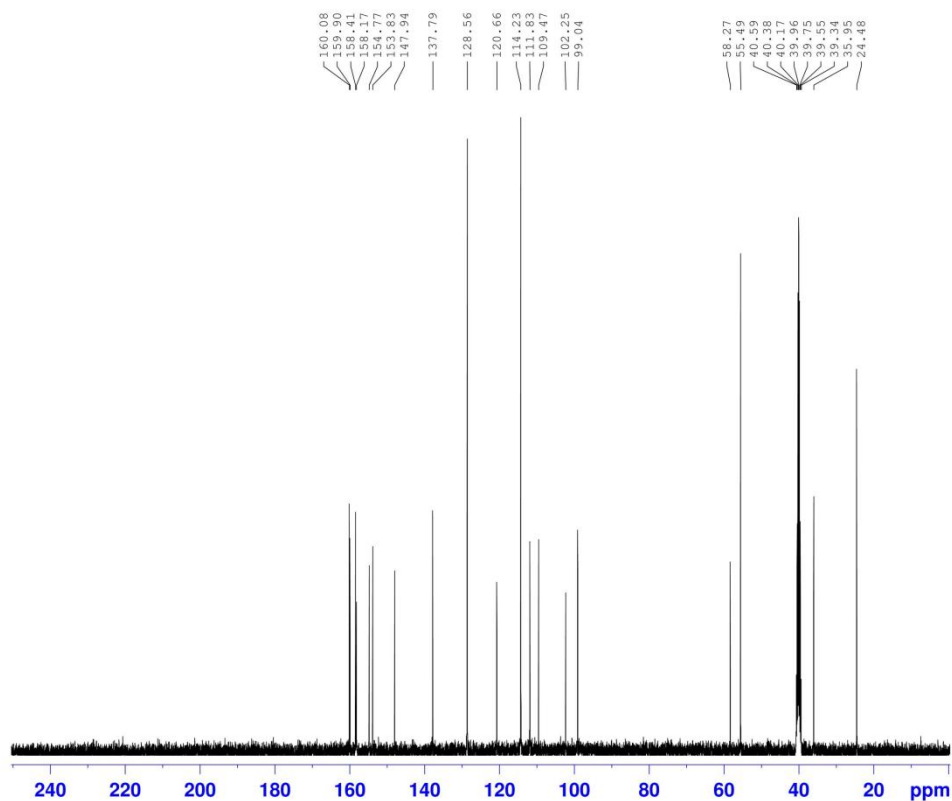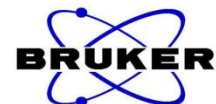

```

NAME      Yasooj UN
EXPNO     157
PROCNO    1
Date_     20111128
Time      16.55
INSTRUM   spect
PROBHD    5 mm PABBO BB-
PULPROG   zgpgg
TD         65536
SOLVENT   DMSO
NS         111
DS         0
SWH        25252.525 Hz
FIDRES     0.385323 Hz
AQ         1.2976629 sec
RG         2050
DW         19.800 usec
DE         6.50 usec
TE         297.1 K
D1         3.00000000 sec
D11        0.03000000 sec
TD0        1

===== CHANNEL f1 =====
NUC1       13C
P1         9.00 usec
PL1        -0.90 dB
PL1W       42.02801895 W
SFO1       100.6479784 MHz

===== CHANNEL f2 =====
CPDPRG2    waltz16
NUC2       1H
PCPD2      90.00 usec
PL2        -2.00 dB
PL12       14.16 dB
PL13       17.90 dB
PL2W       11.86359406 W
PL12W      0.28722104 W
PL13W      0.12139934 W
SFO2       400.2216009 MHz
SI         32768
SF         100.6353990 MHz
WDW        EM
SSB        0
LB         1.00 Hz
GB         0
PC         1.40

```

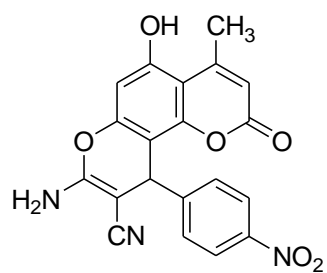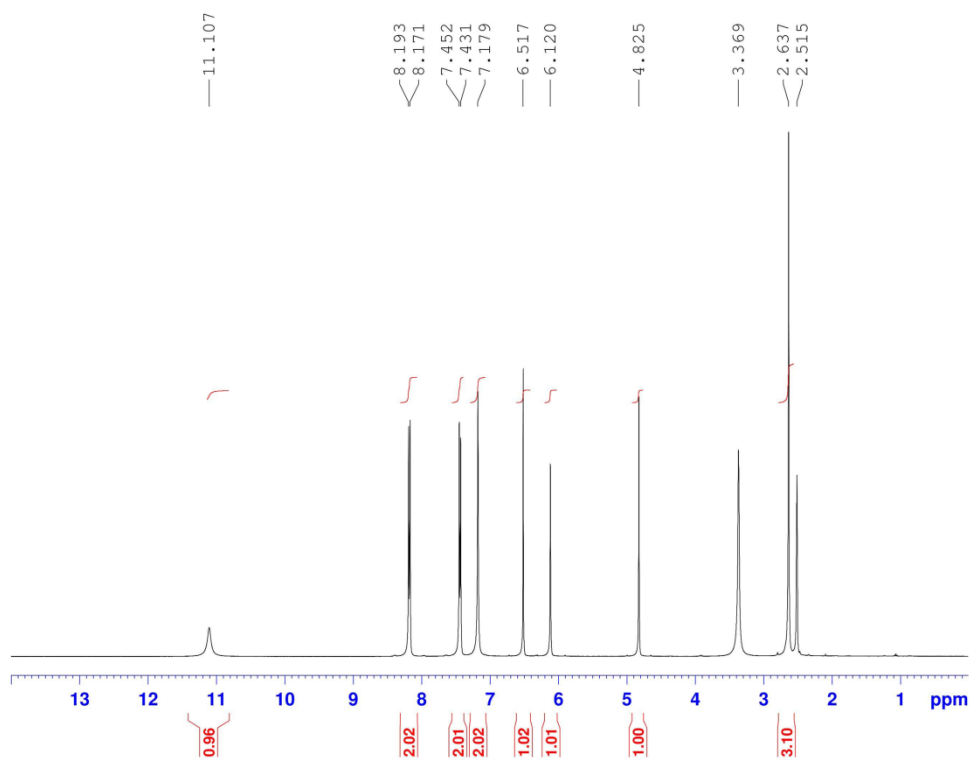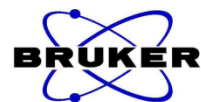

NAME Yasooj UN  
 EXPNO 145  
 PROCNO 1  
 Date\_ 20111128  
 Time 14.38  
 INSTRUM spect  
 PROBHD 5 mm PABBO BB-  
 PULPROG zg30  
 TD 65536  
 SOLVENT DMSO  
 NS 32  
 DS 0  
 SWH 8012.820 Hz  
 FIDRES 0.122266 Hz  
 AQ 4.0894966 sec  
 RG 2050  
 DW 62.400 usec  
 DE 6.50 usec  
 TE 297.0 K  
 D1 6.00000000 sec  
 TD0 1

===== CHANNEL f1 =====  
 NUC1 1H  
 P1 14.00 usec  
 PL1 -2.00 dB  
 PL1W 11.86359406 W  
 SFO1 400.2236020 MHz  
 SI 32768  
 SF 400.2200000 MHz  
 WDW EM  
 SSB 0  
 LB 0.30 Hz  
 GB 0  
 PC 1.00



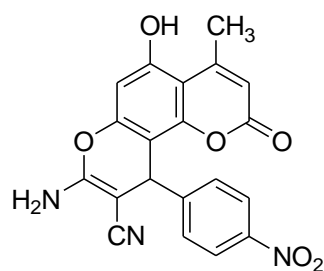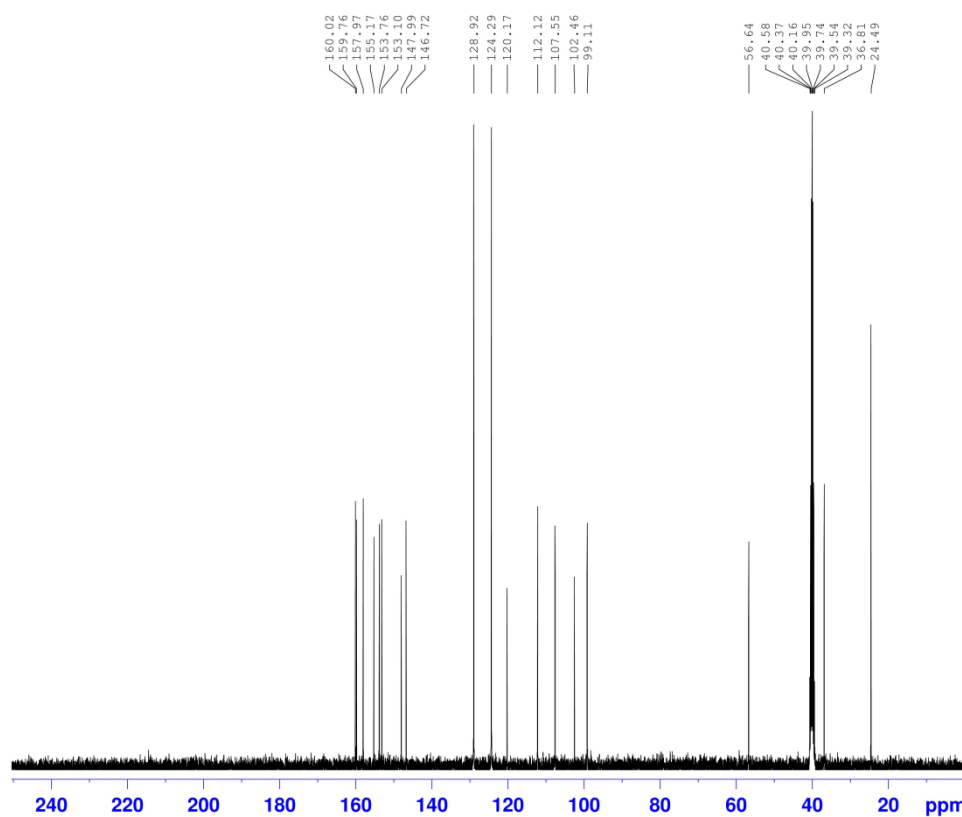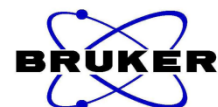

```

NAME      Yasooj UN
EXPNO     158
PROCNO    1
Date_     20111128
Time      17.11
INSTRUM   spect
PROBHD    5 mm PABBO BB-
PULPROG   zgpg
TD         65536
SOLVENT   DMSO
NS         110
DS         0
SWH        25252.525 Hz
FIDRES     0.385323 Hz
AQ         1.2976629 sec
RG         2050
DW         19.800 usec
DE         6.50 usec
TE         297.2 K
D1         3.00000000 sec
D11        0.03000000 sec
TD0        1

```

```

===== CHANNEL f1 =====
NUC1       13C
P1         9.00 usec
PL1        -0.90 dB
PL1W       42.02801895 W
SFO1       100.6479784 MHz

```

```

===== CHANNEL f2 =====
CPDPRG2    waltz16
NUC2        1H
PCPD2       90.00 usec
PL2         -2.00 dB
PL12        14.16 dB
PL13        17.90 dB
PL2W       11.86359406 W
PL12W       0.28722104 W
PL13W       0.12139934 W
SFO2       400.2216009 MHz
SI          32768
SF         100.6353990 MHz
WDW         EM
SSB         0
LB          1.00 Hz
GB          0
PC          1.40

```

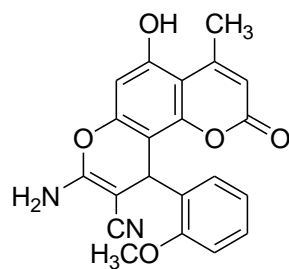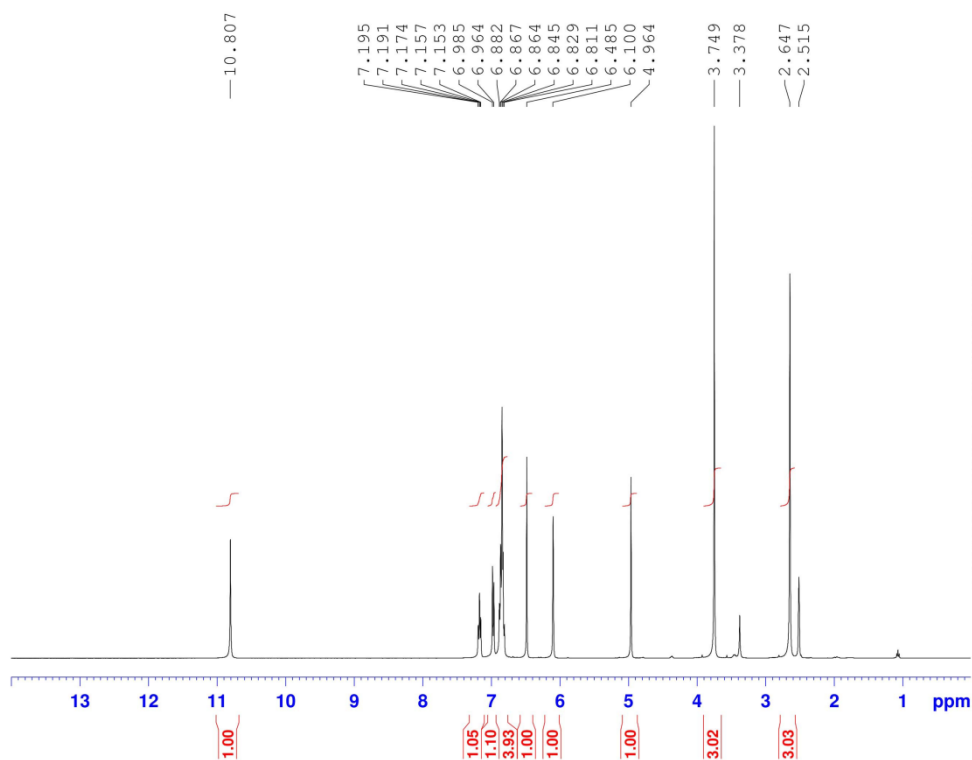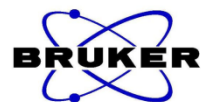

```

NAME      Yasooj UN
EXPNO     146
PROCNO    1
Date_     20111128
Time      14.48
INSTRUM   spect
PROBHD    5 mm PABBO BB-
PULPROG   zg30
TD         65536
SOLVENT   DMSO
NS         32
DS         0
SWH        8012.820 Hz
FIDRES     0.122266 Hz
AQ         4.0894966 sec
RG         1620
DW         62.400 usec
DE         6.50 usec
TE         297.0 K
D1         6.00000000 sec
TD0        1

===== CHANNEL f1 =====
NUC1       1H
P1         14.00 usec
PL1        -2.00 dB
PL1W       11.86359406 W
SFO1       400.2236020 MHz
SI         32768
SF         400.2200000 MHz
WDW        EM
SSB        0
LB         0.30 Hz
GB         0
PC         1.00

```

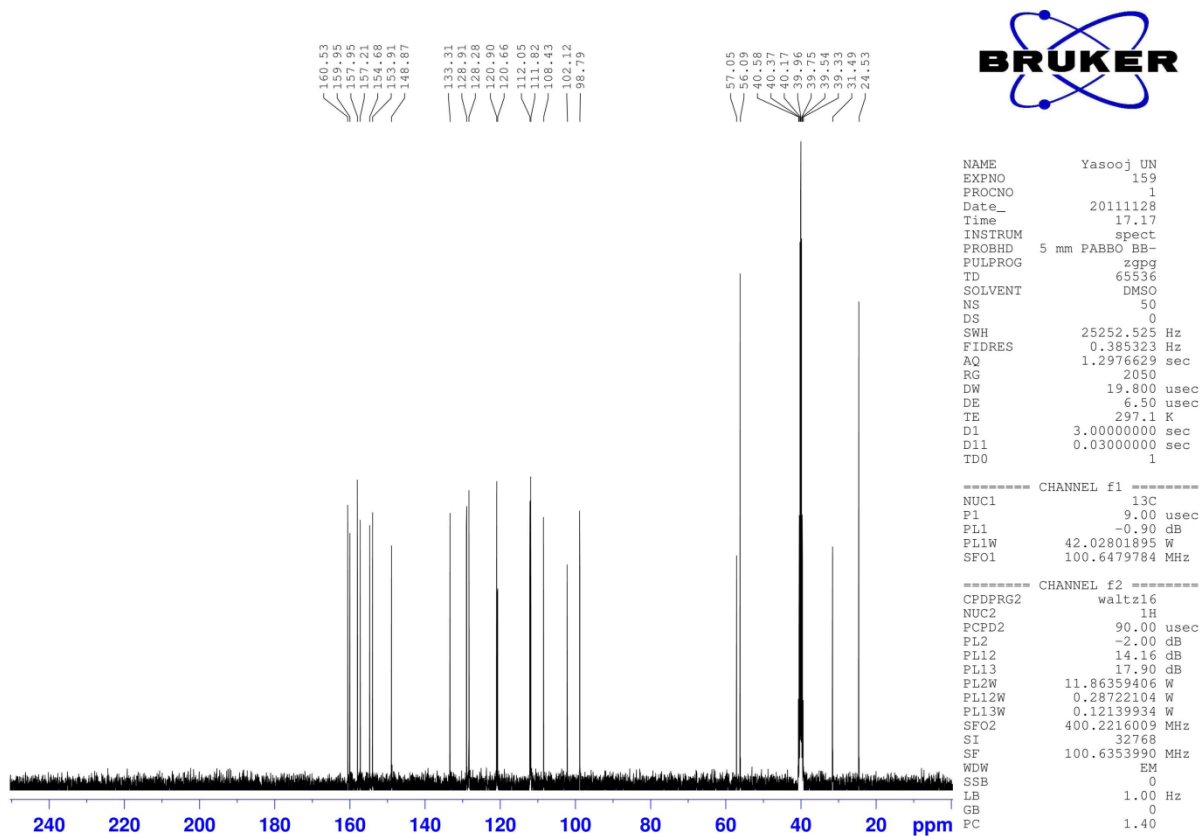

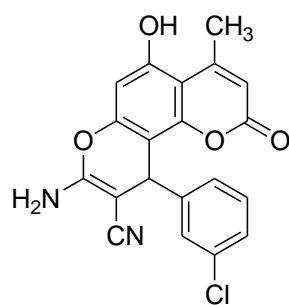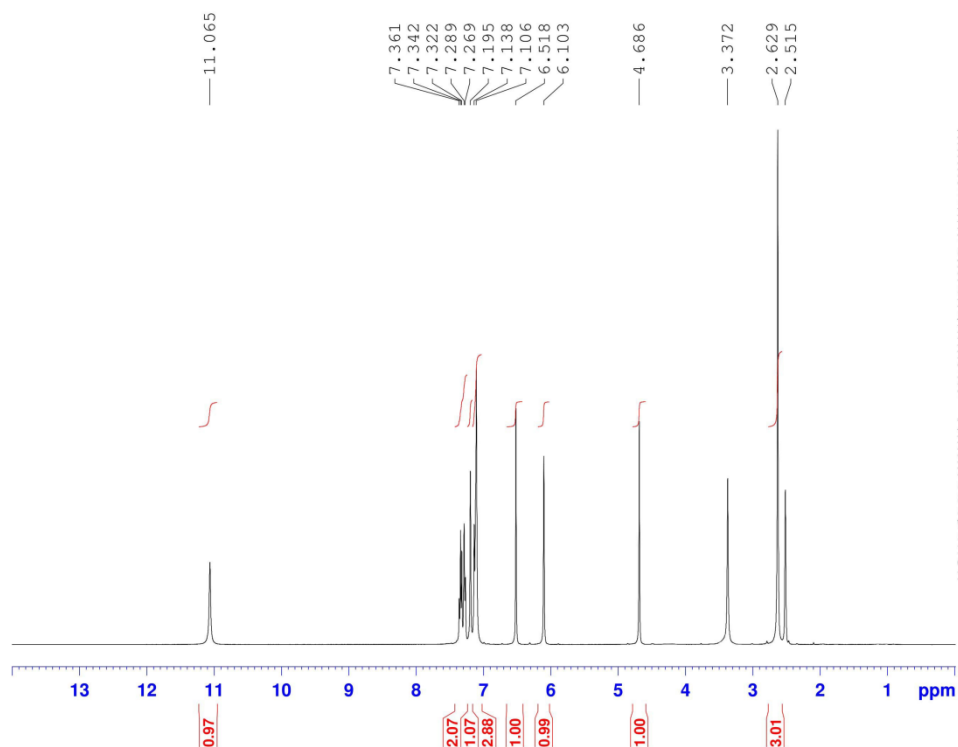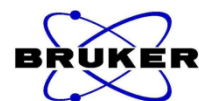

```

NAME      Yasooj UN
EXPNO     147
PROCNO    1
Date_     20111128
Time      14.57
INSTRUM   spect
PROBHD    5 mm PABBO BB-
PULPROG   zg30
TD         65536
SOLVENT   DMSO
NS         32
DS         0
SWH        8012.820 Hz
FIDRES     0.122266 Hz
AQ         4.0894966 sec
RG         1620
DW         62.400 usec
DE         6.50 usec
TE         297.0 K
D1         6.00000000 sec
TD0        1

```

```

===== CHANNEL f1 =====
NUC1      1H
P1        14.00 usec
PL1       -2.00 dB
PL1W      11.86359406 W
SFO1      400.2236020 MHz
SI        32768
SF        400.2200000 MHz
WDW       EM
SSB        0
LB         0.30 Hz
GB         0
PC         1.00

```

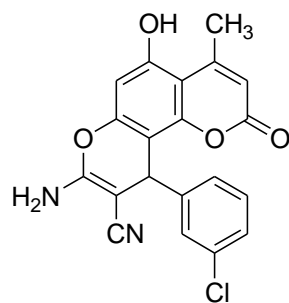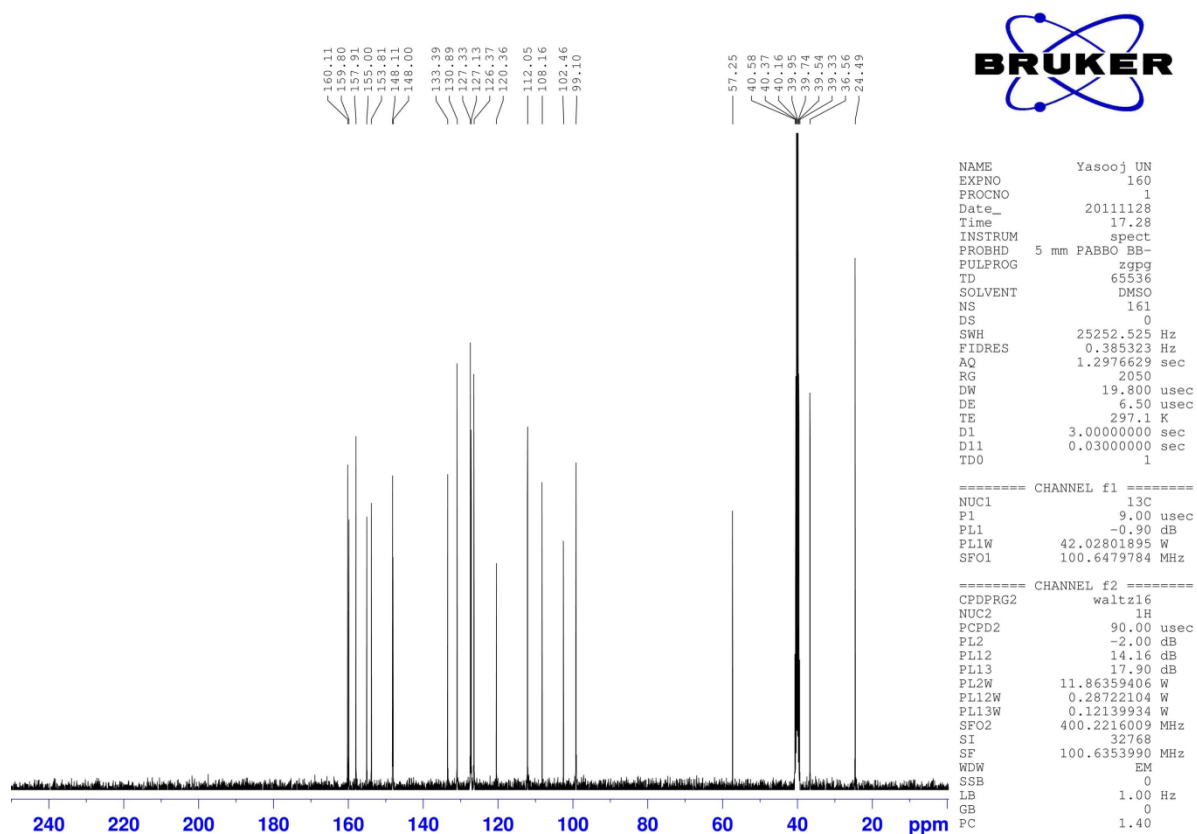

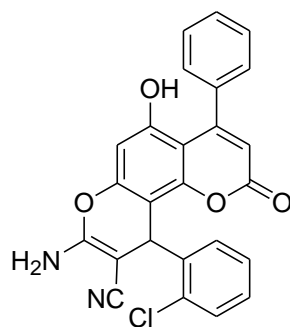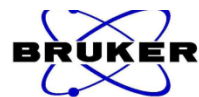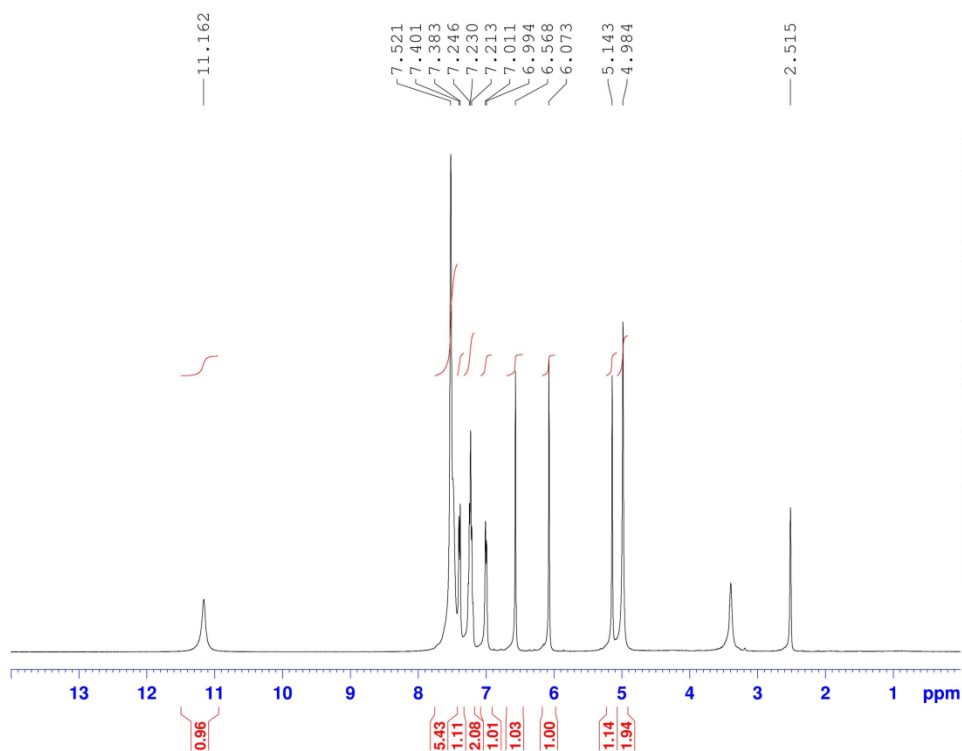

```

NAME      Yasooj UN
EXPNO     148
PROCNO    1
Date_     20111128
Time      15.06
INSTRUM   spect
PROBHD    5 mm PABBO BB-
PULPROG   zg30
TD        65536
SOLVENT   DMSO
NS         32
DS         0
SWH        8012.820 Hz
FIDRES     0.122266 Hz
AQ         4.0894966 sec
RG         1290
DW         62.400 usec
DE         6.50 usec
TE         297.0 K
D1         6.00000000 sec
TD0        1

===== CHANNEL f1 =====
NUC1       1H
P1         14.00 usec
PL1        -2.00 dB
PL1W       11.86359406 W
SFO1       400.2236020 MHz
SI         32768
SF         400.2200000 MHz
WDW        EM
SSB        0
LB         0.30 Hz
GB         0
PC         1.00

```

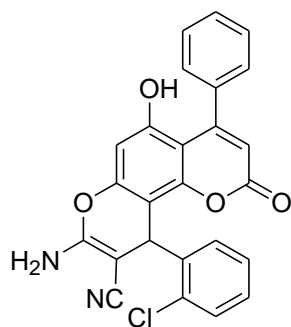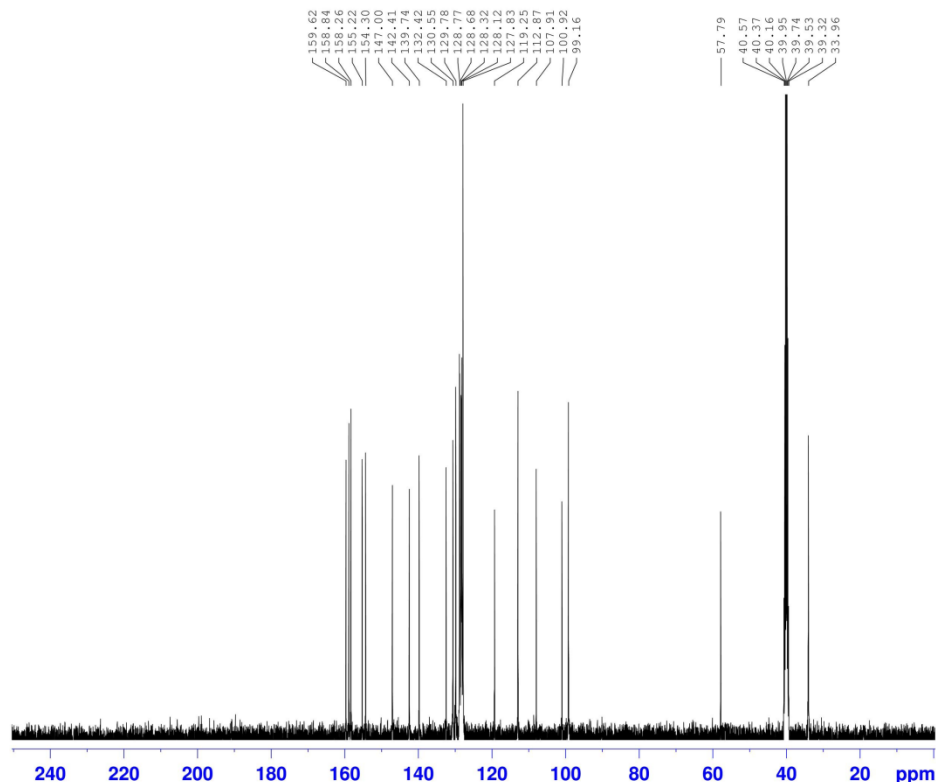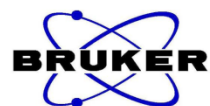

NAME Yasooj UN  
EXPNO 161  
PROCNO 1  
Date\_ 20111128  
Time 17.41  
INSTRUM spect  
PROBHD 5 mm PABBO BB-  
PULPROG zgpg  
TD 65536  
SOLVENT DMSO  
NS 130  
DS 0  
SWH 25252.525 Hz  
FIDRES 0.385323 Hz  
AQ 1.2976629 sec  
RG 2050  
DW 19.800 usec  
DE 6.50 usec  
TE 297.1 K  
D1 3.00000000 sec  
D11 0.03000000 sec  
TD0 1

===== CHANNEL f1 =====  
NUC1 13C  
P1 9.00 usec  
PL1 -0.90 dB  
PL1W 42.02801895 W  
SFO1 100.6479784 MHz

===== CHANNEL f2 =====  
CPDPRG2 waltz16  
NUC2 1H  
PCPD2 90.00 usec  
PL2 -2.00 dB  
PL12 14.16 dB  
PL13 17.90 dB  
PL2W 11.86359406 W  
PL12W 0.28722104 W  
PL13W 0.12139934 W  
SFO2 400.2216009 MHz  
SI 32768  
SF 100.6353990 MHz  
WDW EM  
SSB 0  
LB 1.00 Hz  
GB 0  
PC 1.40

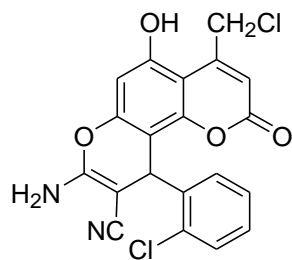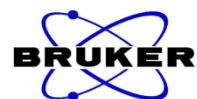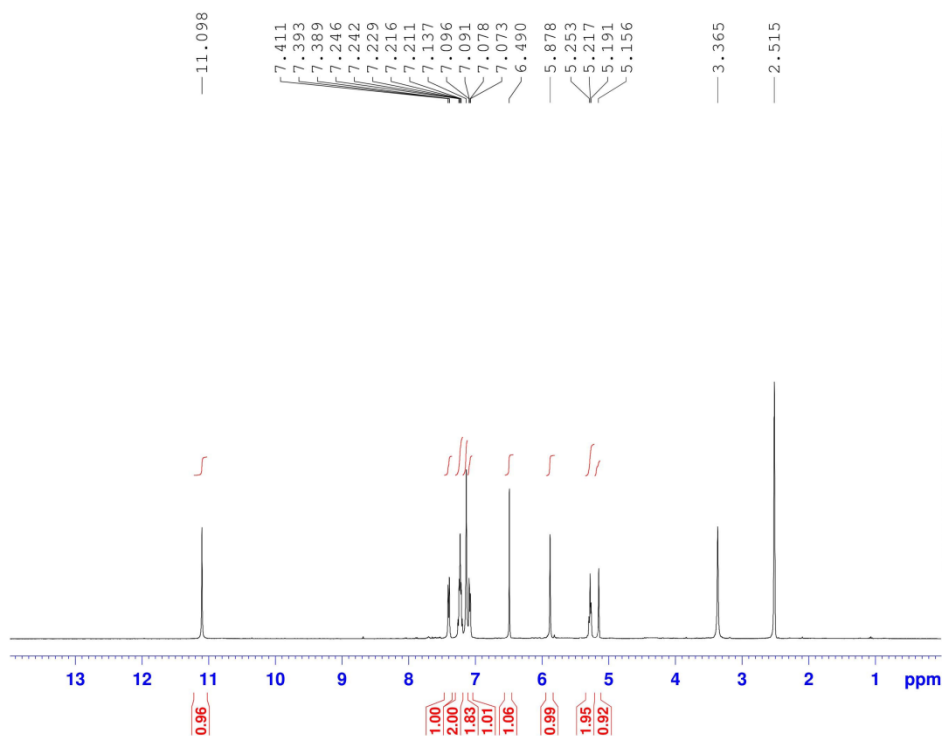

```

NAME      Yasooj UN
EXPNO     149
PROCNO    1
Date_     20111128
Time      15.20
INSTRUM   spect
PROBHD    5 mm PABBO BB-
PULPROG   zg30
TD         65536
SOLVENT   DMSO
NS         32
DS         0
SWH        8012.820 Hz
FIDRES     0.122266 Hz
AQ         4.0894966 sec
RG         2050
DW         62.400 usec
DE         6.50 usec
TE         297.1 K
D1         6.00000000 sec
TD0        1

===== CHANNEL f1 =====
NUC1       1H
P1         14.00 usec
PL1        -2.00 dB
PL1W       11.86359406 W
SF01       400.2236020 MHz
SI         32768
SF         400.2200000 MHz
WDW        EM
SSB        0
LB         0.30 Hz
GB         0
PC         1.00

```



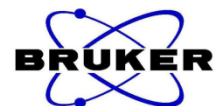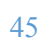

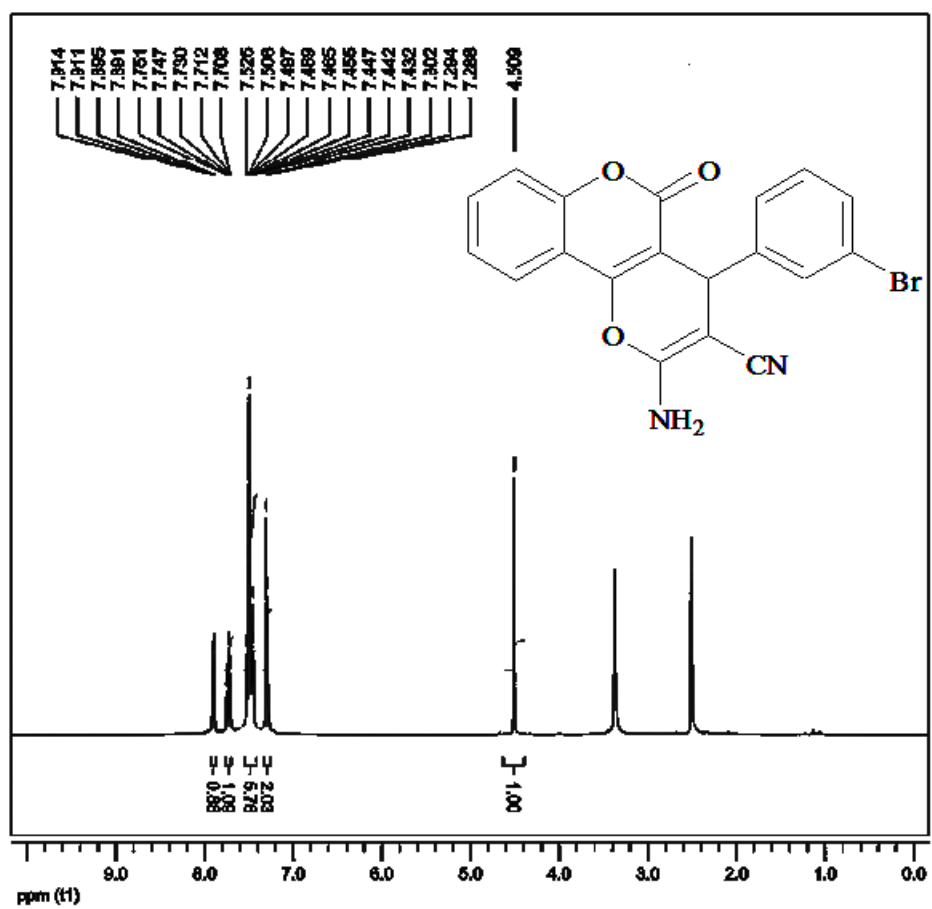

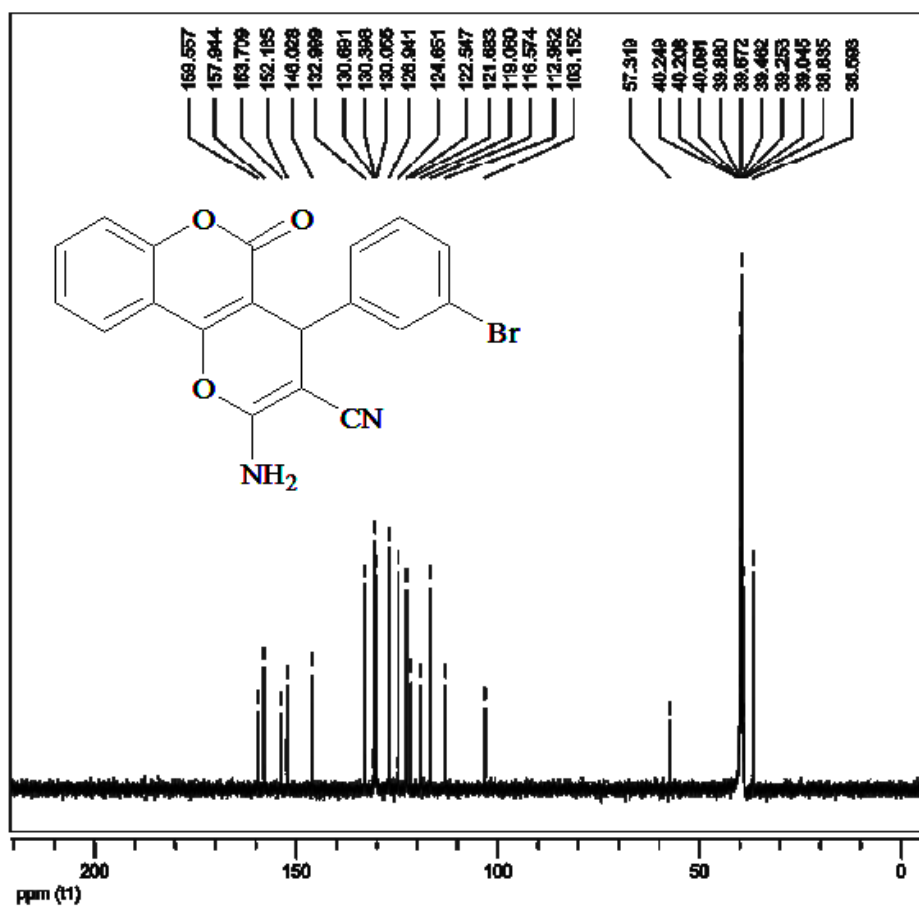

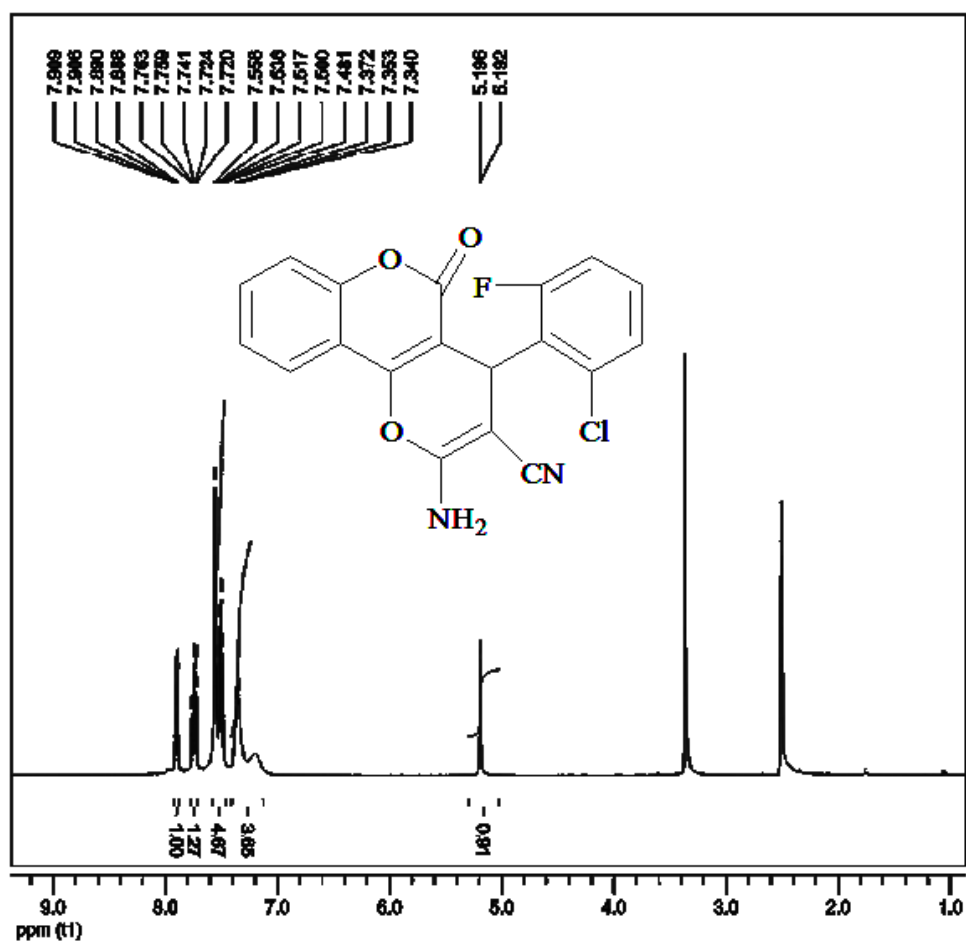

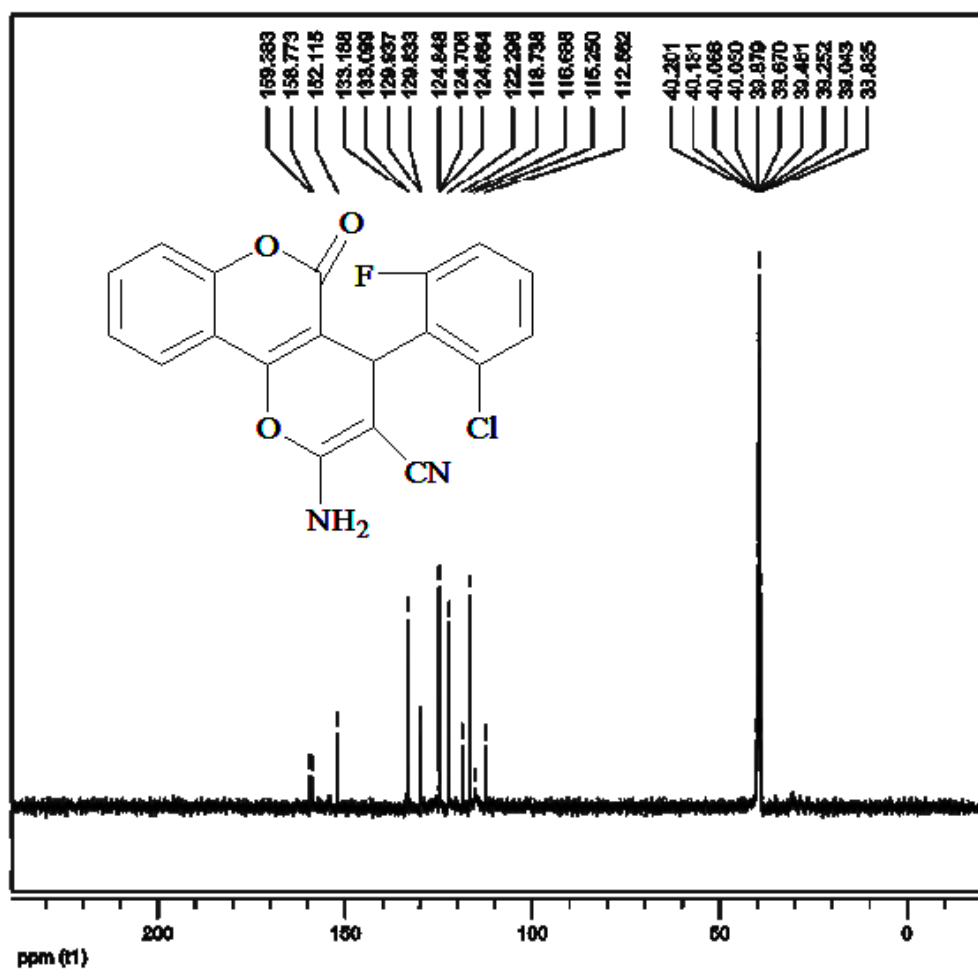

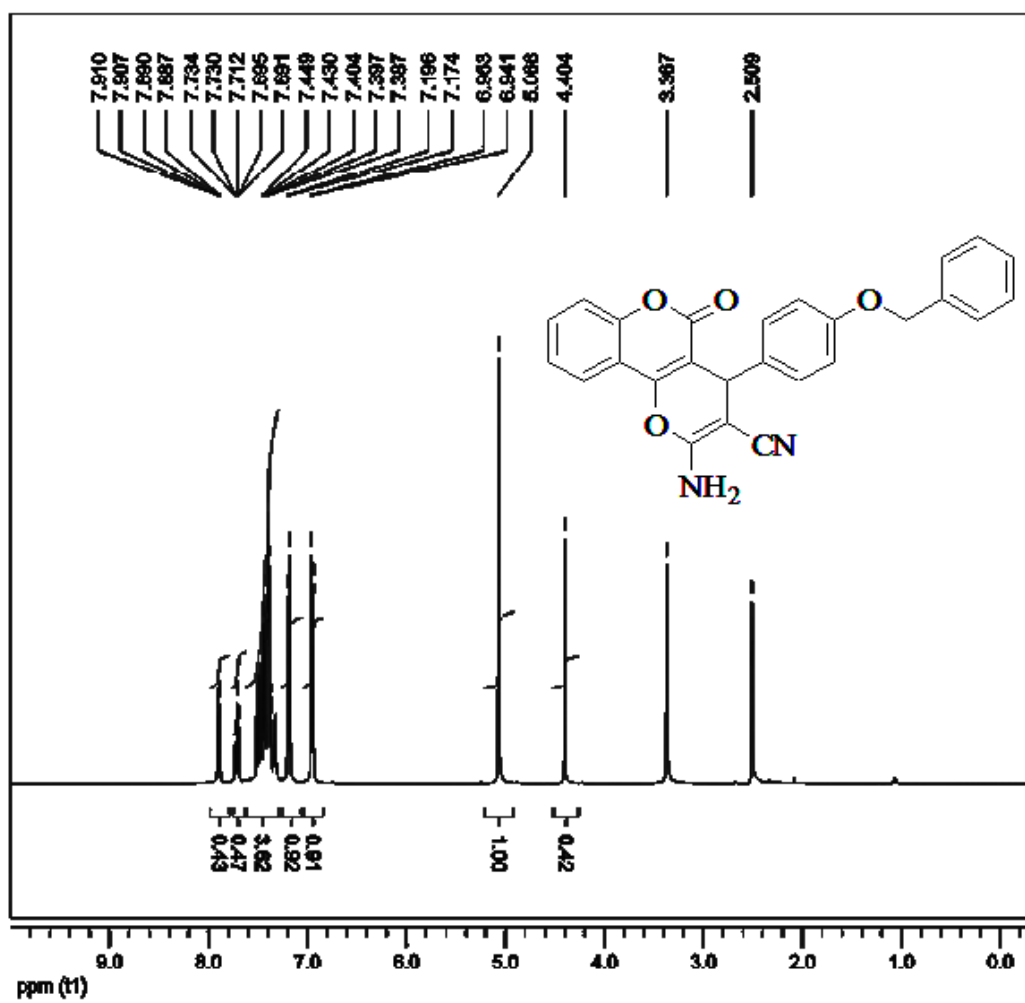

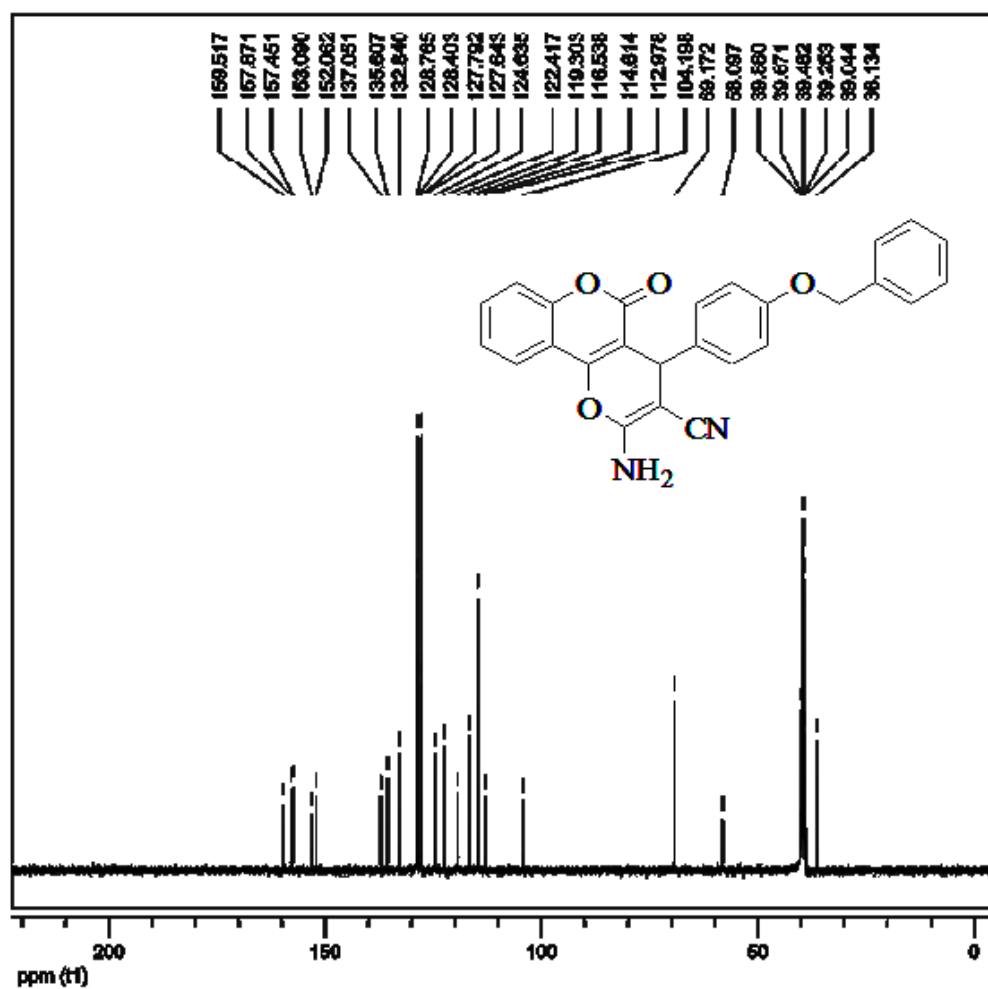

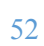



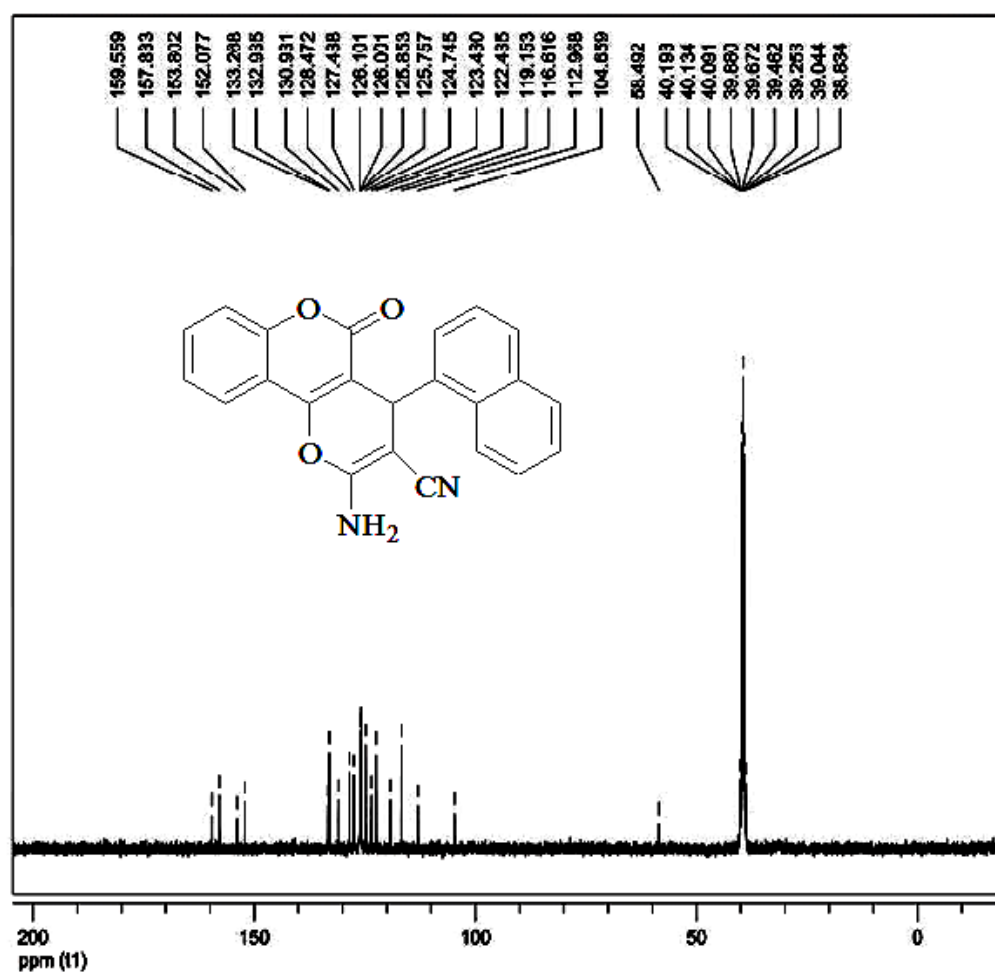

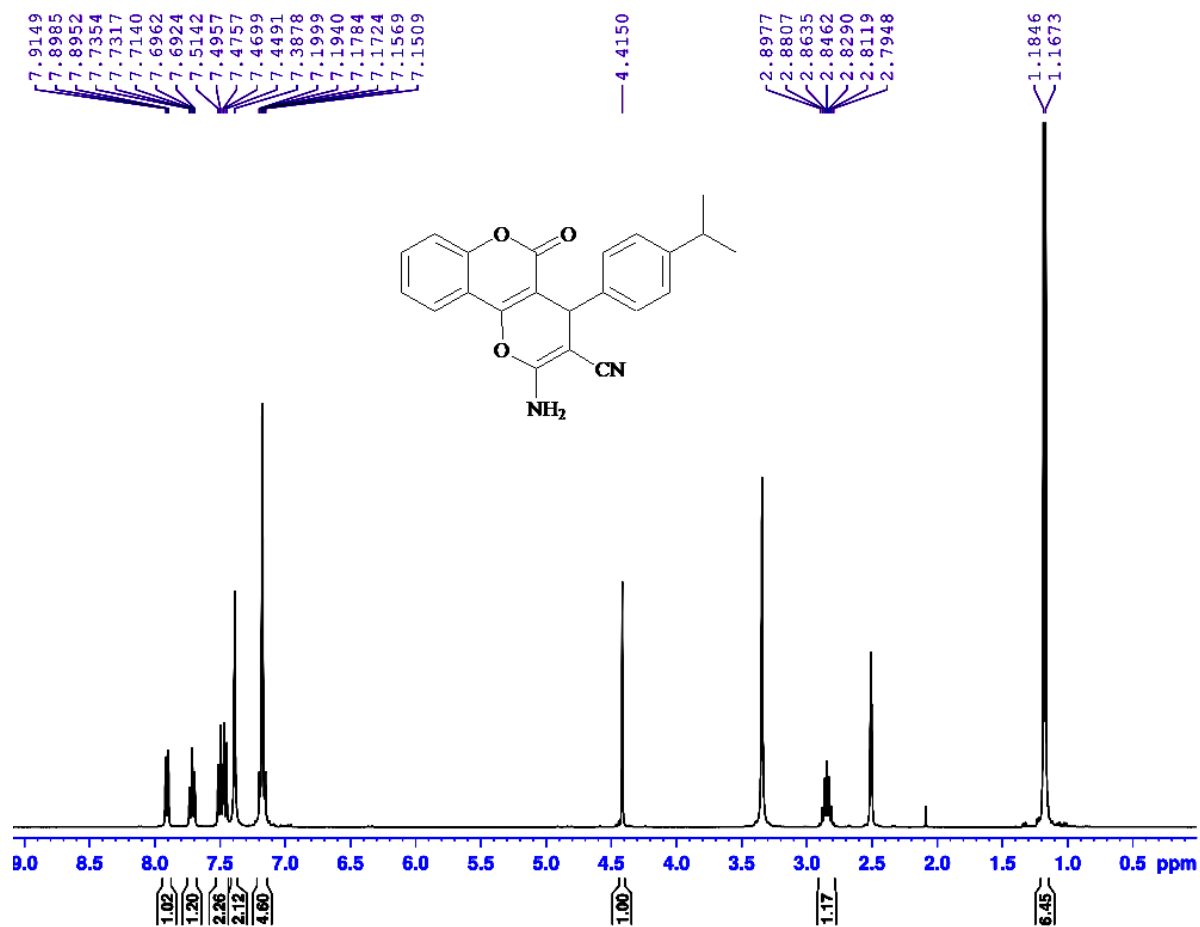

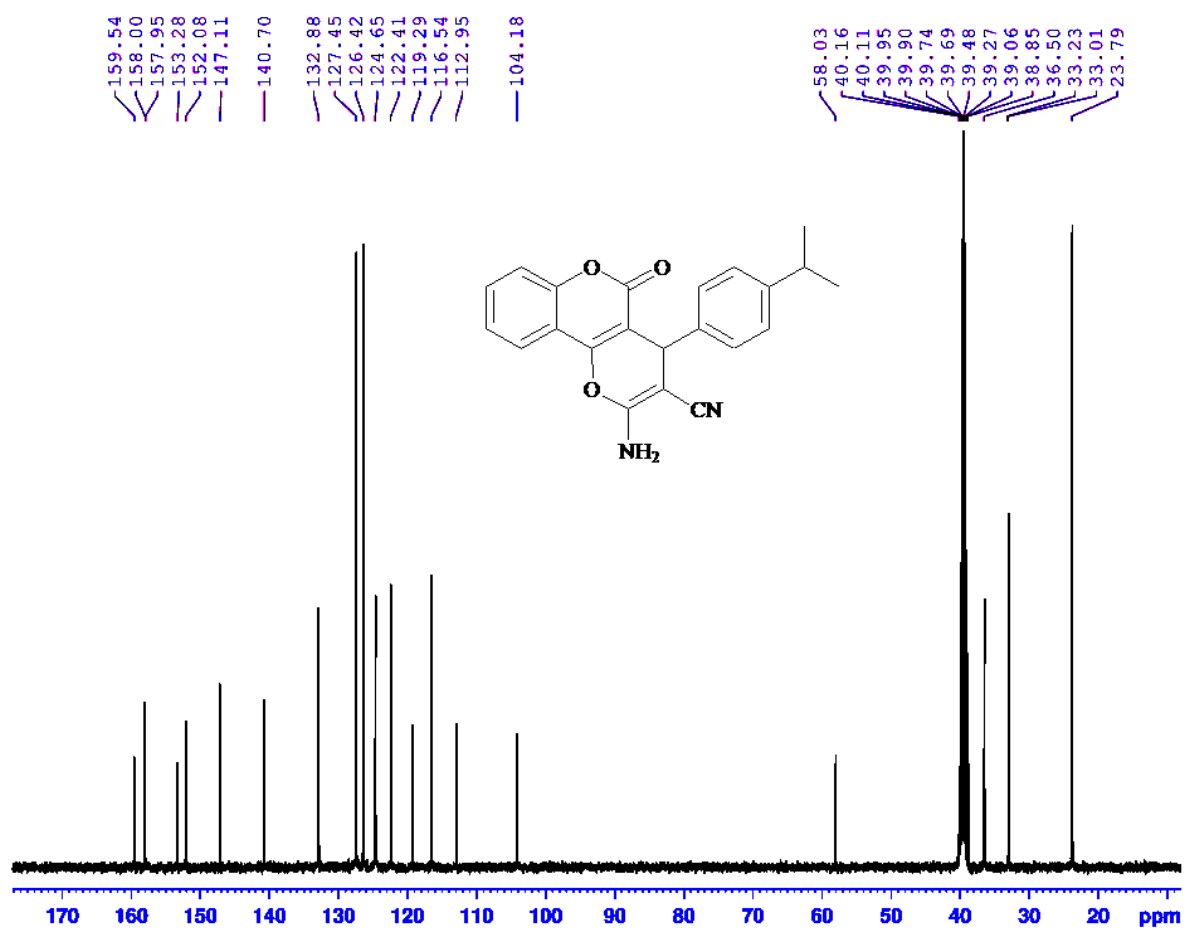

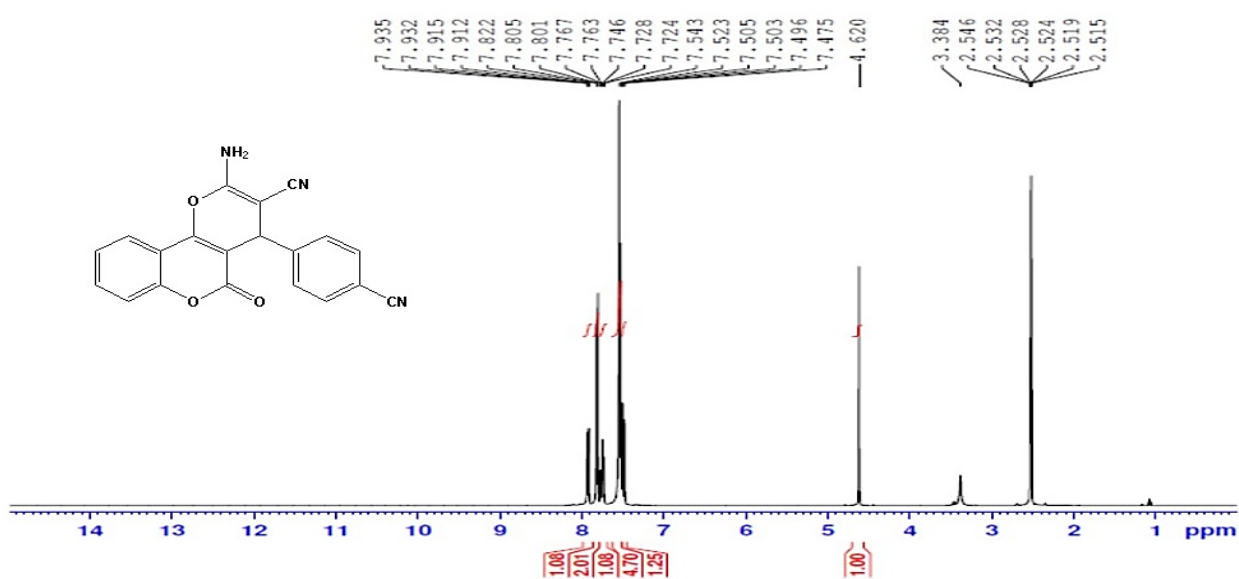

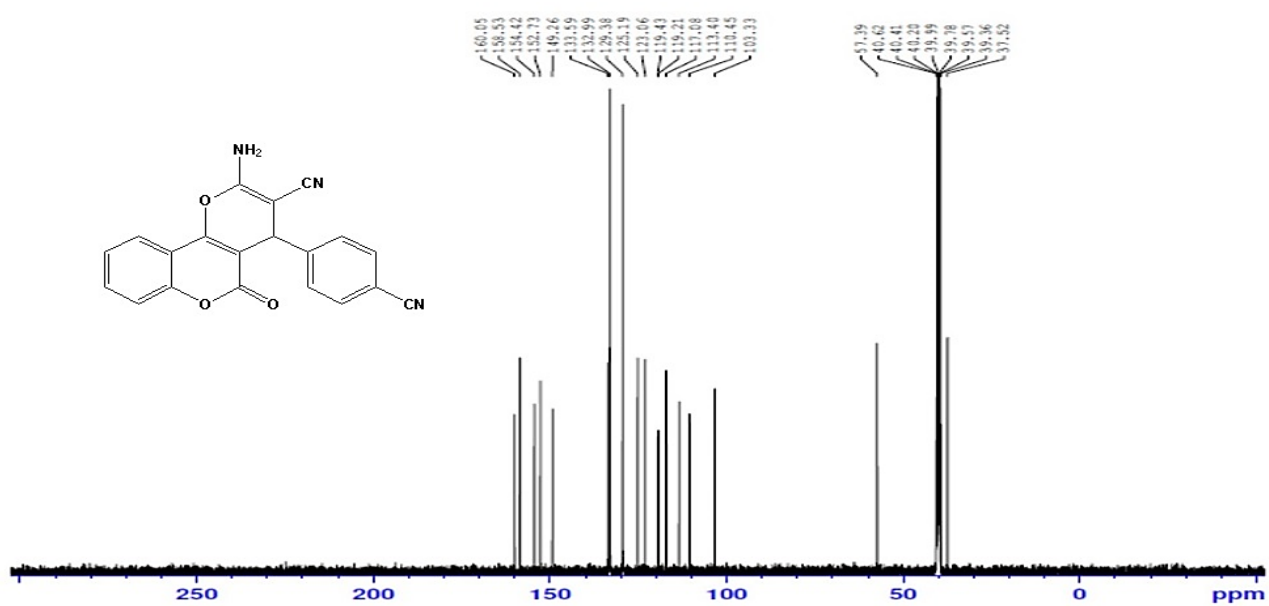

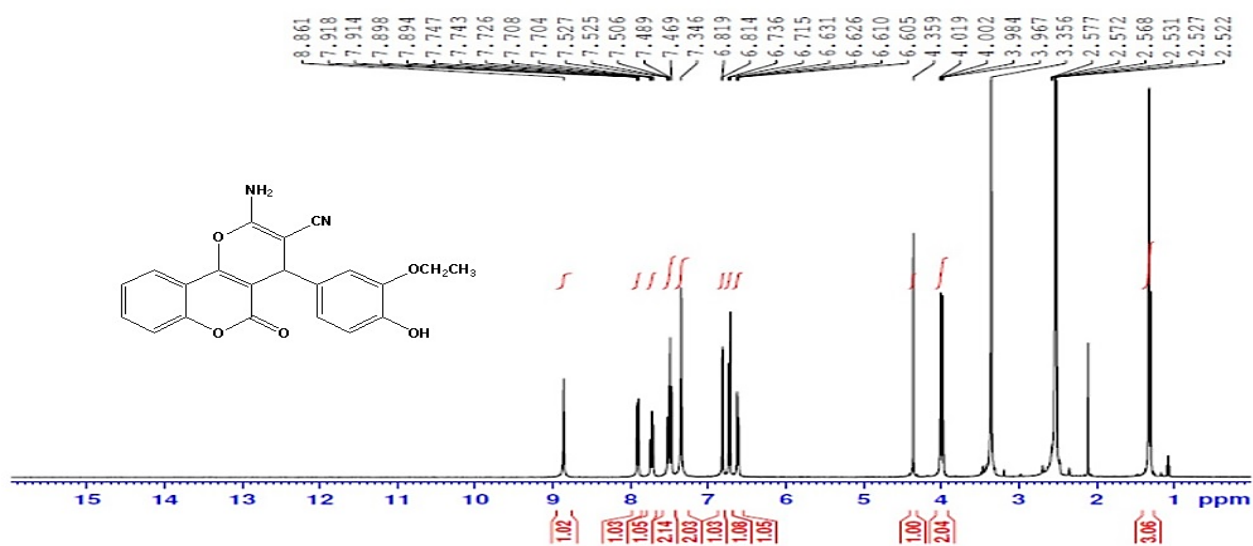

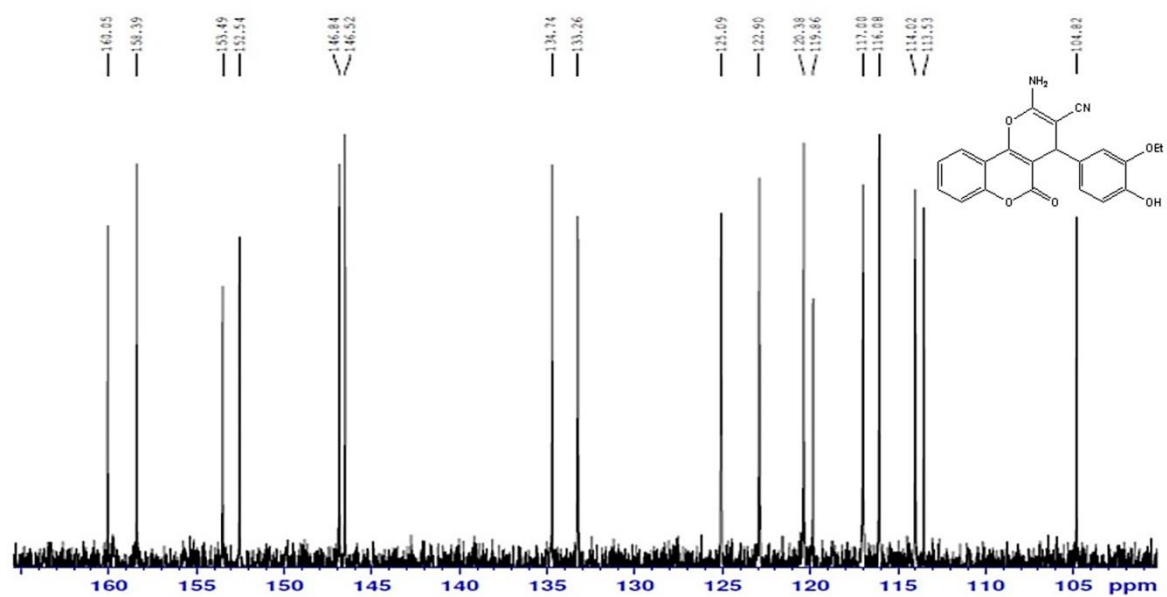

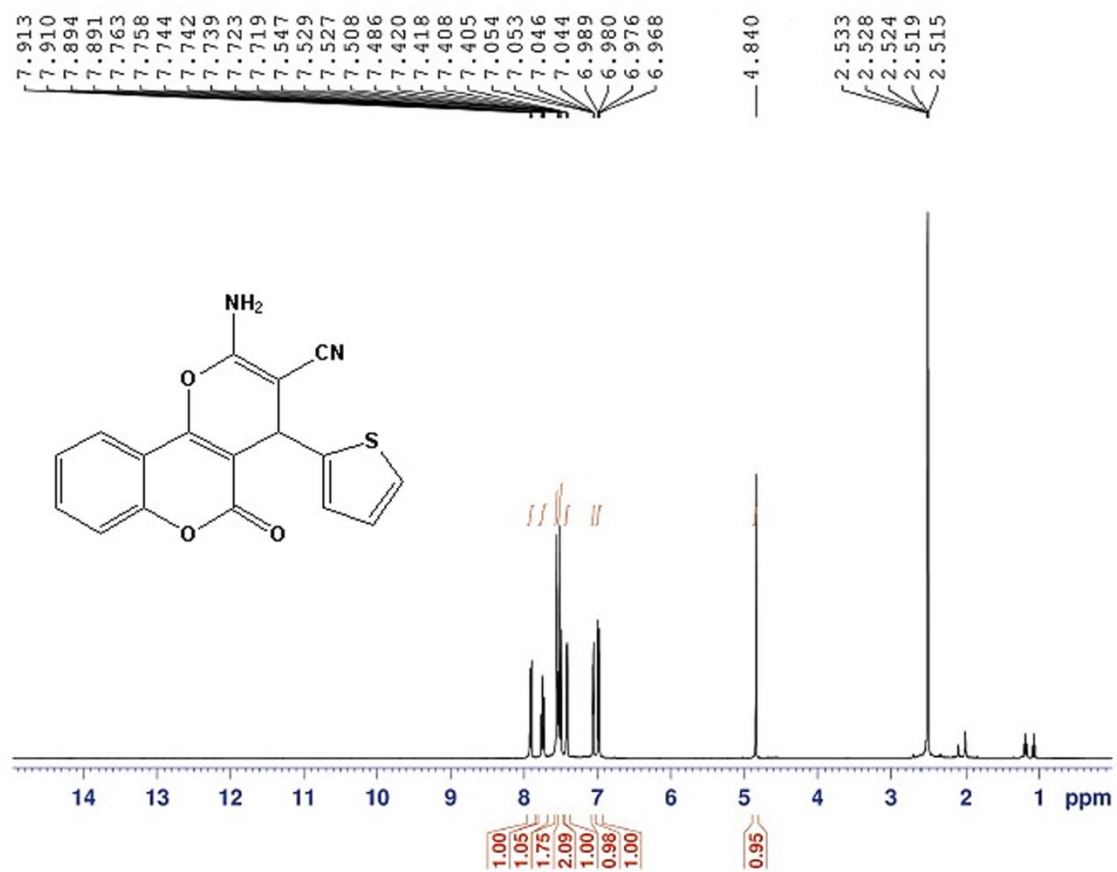



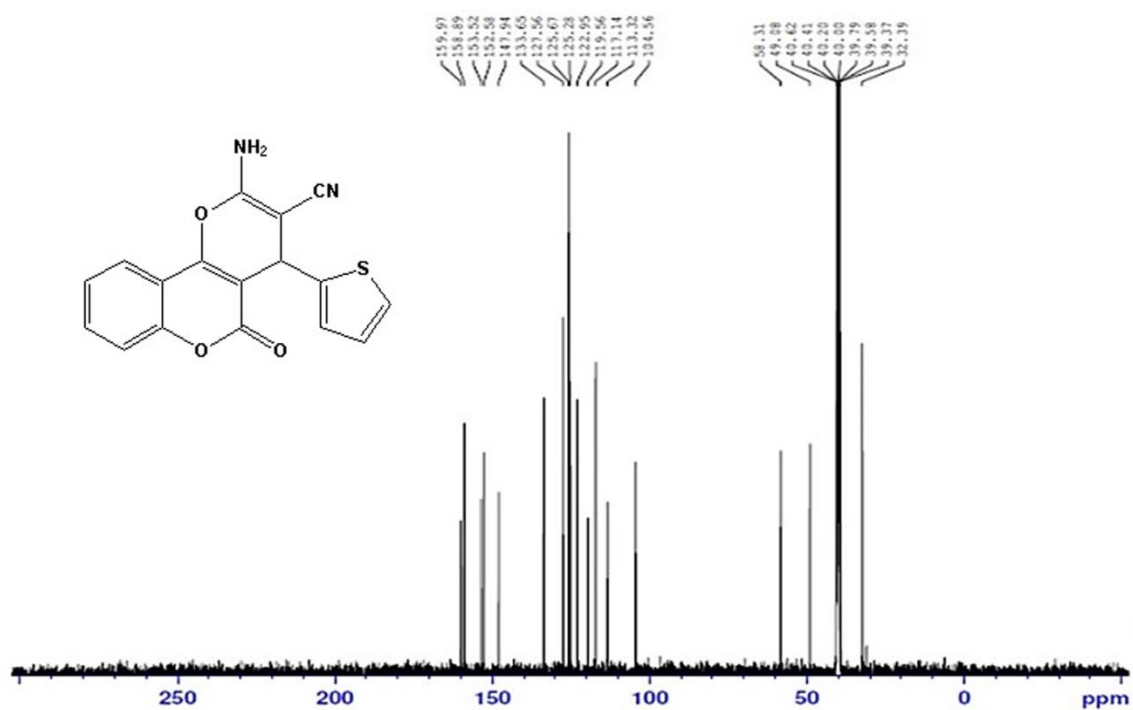

Supplement: c7ra08253c1.pdf [file c7ra08253c1.pdf]
